# Supplementary material for: Electronic structure and bridge geometric distortion in push–pull imine-bridged triads. A theoretical study
Source: Royal Society of Chemistry journal article supplement (doi:10.1039/d1nj00152c), 2021-01-01
Supplement: d1nj00152c1.pdf [file d1nj00152c1.pdf]

## Supporting Information

# Electronic structure and bridge geometric distortion in push-pull imine-bridged triads. A theoretical study

**Arturo Espinosa Ferao,<sup>\*</sup> Antonio García Alcaraz, Rafaela García López**

Departamento Química Orgánica, Facultad de Química, Campus de Espinardo, Universidad de Murcia,  
30100 Murcia (Spain), E-mail: [artuesp@um.es](mailto:artuesp@um.es).

### Table of contents

|                                                                                                                                                      | <u>page</u> |
|------------------------------------------------------------------------------------------------------------------------------------------------------|-------------|
| <u>Table S1</u> : Computed ferrocene GDPs for compounds <b>4</b> , <b>5</b> , <b>6</b> and derivatives                                               | S2          |
| <u>Figure S1</u> : Calculated (B97-3c) ferrocene GDPs for compounds <b>4</b> , <b>5</b> , <b>6</b> and derivatives                                   | S4          |
| Transformation of NN into virtual CC bonds                                                                                                           | S5          |
| <u>Figure S2</u> : Structures used for computing distances for single and double NN links                                                            | S5          |
| <u>Table S2</u> : Computed GEO, EN and HOMCEc parameters for compounds <b>5</b> and <b>6</b> .                                                       | S6          |
| <u>Figure S3</u> : Calculated HOMCEc parameters (B97-3c) for the description of the bridge geometric distortion in compounds <b>5</b> and <b>6</b> . | S8          |
| <u>Calculated structures</u> : Cartesian coordinates and energies for all minima                                                                     | S9          |

**Table S1.** Computed ferrocene GDPs for compounds **4**, **5**, **6** and derivatives.

| <b>Comp.</b>                           | <b>B3LYP-D4/def2-TZVP</b>                 |                                    |                            | <b>B97-3c</b>                             |                          |                  |
|----------------------------------------|-------------------------------------------|------------------------------------|----------------------------|-------------------------------------------|--------------------------|------------------|
|                                        | <b>dFe-Cp<sub>b</sub><sup>c</sup> [a]</b> | <b>β<sub>T</sub><sup>[b]</sup></b> | <b>HOMFc<sup>[a]</sup></b> | <b>dFe-Cp<sub>b</sub><sup>c</sup> [a]</b> | <b>β<sub>T</sub> [b]</b> | <b>HOMFc [a]</b> |
| <b>Ferrocene</b>                       | 1.6791                                    | 0.06                               | 0.0000                     | 1.6274                                    | 0.02                     | 0.0000           |
| <b>Ferrocene<sup>+</sup></b>           | 1.7029                                    | 0.04                               | 0.0000                     | 1.7073                                    | 0.45                     | -0.0100          |
| <b>4a</b>                              | 1.6799                                    | 0.67                               | 0.0263                     | 1.6389                                    | 1.22                     | 0.0257           |
| <b>4a·H<sup>+</sup></b>                | 1.6961                                    | 7.41                               | 0.1452                     | 1.6628                                    | 9.54                     | 0.0847           |
| <b>4b</b>                              | 1.6794                                    | 0.69                               | 0.0264                     | 1.6371                                    | 1.10                     | 0.0277           |
| <b>4b·H<sup>+</sup></b>                | 1.6933                                    | 6.09                               | 0.1357                     | 1.6591                                    | 8.33                     | 0.0841           |
| <b>4c</b>                              | 1.6824                                    | 1.40                               | 0.0058                     | 1.6377                                    | 2.25                     | 0.0083           |
| <b>4c·H<sup>+</sup></b>                | 1.6904                                    | 3.48                               | 0.0574                     | 1.6583                                    | 4.86                     | 0.0440           |
| <b>4d</b>                              | 1.6798                                    | 0.46                               | 0.0121                     | 1.6352                                    | 0.46                     | 0.0139           |
| <b>4d·H<sup>+</sup></b>                | 1.6909                                    | 4.64                               | 0.0682                     | 1.6594                                    | 6.15                     | 0.0327           |
| <b>4e</b>                              | 1.6798                                    | 0.53                               | 0.0118                     | 1.6342                                    | 0.26                     | 0.0140           |
| <b>4e·H<sup>+</sup></b>                | 1.6854                                    | 1.87                               | 0.0284                     | 1.6359                                    | 0.37                     | 0.0154           |
| <b>5c</b>                              | 1.6809                                    | 0.21                               | 0.0198                     | 1.6398                                    | 0.94                     | 0.0232           |
| <b>5d</b>                              | 1.6796                                    | 0.80                               | 0.0091                     | 1.6326                                    | 0.53                     | 0.0135           |
| <b>5d<sup>+</sup> Fc<sub>1</sub></b>   | 1.6865                                    | 2.72                               | 0.0423                     | 1.6699                                    | 4.03                     | 0.0178           |
| <b>5d<sup>+</sup> Fc<sub>2</sub></b>   | 1.7473                                    | 0.25                               | 0.0152                     | 1.6699                                    | 4.00                     | 0.0177           |
| <b>6g</b>                              | 1.68                                      | 0.37                               | 0.0112                     | 1.6327                                    | 0.59                     | 0.0134           |
| <b>6g·H<sup>+</sup></b>                | 1.6911                                    | 5.94                               | 0.1150                     | 1.654                                     | 7.60                     | 0.0794           |
| <b>6h</b>                              | 1.6798                                    | 0.81                               | 0.0106                     | 1.6335                                    | 1.07                     | 0.0127           |
| <b>6h·H<sup>+</sup></b>                | 1.6895                                    | 4.41                               | 0.0789                     | 1.6515                                    | 5.92                     | 0.0587           |
| <b>6i</b>                              | 1.6805                                    | 0.58                               | 0.0198                     | 1.6374                                    | 1.62                     | 0.0197           |
| <b>6i·H<sup>+</sup></b>                | 1.691                                     | 5.65                               | 0.1180                     | 1.6557                                    | 7.63                     | 0.0813           |
| <b>6j Fc<sub>1</sub></b>               | 1.6825                                    | 0.96                               | 0.0104                     | 1.6381                                    | 0.87                     | 0.0130           |
| <b>6j·H<sup>+</sup> Fc<sub>1</sub></b> | 1.689                                     | 4.27                               | 0.0751                     | 1.6515                                    | 5.50                     | 0.0572           |
| <b>6j Fc<sub>2</sub></b>               | 1.6795                                    | 1.16                               | 0.0114                     | 1.6328                                    | 0.49                     | 0.0208           |

**Table S1.** Cont.

| <b>Comp.</b>                           | <b>B3LYP-D4/def2-TZVP</b>                 |                                    |                            | <b>B97-3c</b>                             |                                    |                            |
|----------------------------------------|-------------------------------------------|------------------------------------|----------------------------|-------------------------------------------|------------------------------------|----------------------------|
|                                        | <b>dFe-Cp<sub>b</sub><sup>c</sup> [a]</b> | <b>β<sub>T</sub><sup>[b]</sup></b> | <b>HOMFc<sup>[a]</sup></b> | <b>dFe-Cp<sub>b</sub><sup>c</sup> [a]</b> | <b>β<sub>T</sub><sup>[b]</sup></b> | <b>HOMFc<sup>[a]</sup></b> |
| <b>6j·H<sup>+</sup> Fc<sub>2</sub></b> | 1.6863                                    | 2.18                               | 0.0033                     | 1.6461                                    | 3.16                               | 0.0042                     |
| <b>6j<sup>+</sup> Fc<sub>1</sub></b>   | 1.6894                                    | 3.20                               | 0.0487                     | 1.6768                                    | 1.26                               | 0.0110                     |
| <b>6j<sup>+</sup> Fc<sub>2</sub></b>   | 1.7495                                    | 0.74                               | 0.0159                     | 1.6513                                    | 2.22                               | 0.0187                     |
| <b>6n</b>                              | 1.6795                                    | 0.69                               | 0.0107                     | 1.6321                                    | 0.13                               | 0.0162                     |
| <b>6n·H<sup>+</sup></b>                | 1.6902                                    | 3.98                               | 0.0210                     | 1.6531                                    | 5.48                               | 0.0138                     |
| <b>6o</b>                              | 1.6795                                    | 1.06                               | 0.0120                     | 1.6329                                    | 0.51                               | 0.0203                     |
| <b>6o·H<sup>+</sup></b>                | 1.6867                                    | 2.30                               | 0.0046                     | 1.6473                                    | 3.80                               | 0.0048                     |
| <b>6p</b>                              | 1.6805                                    | 1.40                               | 0.0228                     | 1.6413                                    | 0.09                               | 0.0302                     |
| <b>6p·H<sup>+</sup></b>                | 1.6892                                    | 3.62                               | 0.0207                     | 1.6583                                    | 5.32                               | 0.0107                     |

[a] In Å. [b] In °.

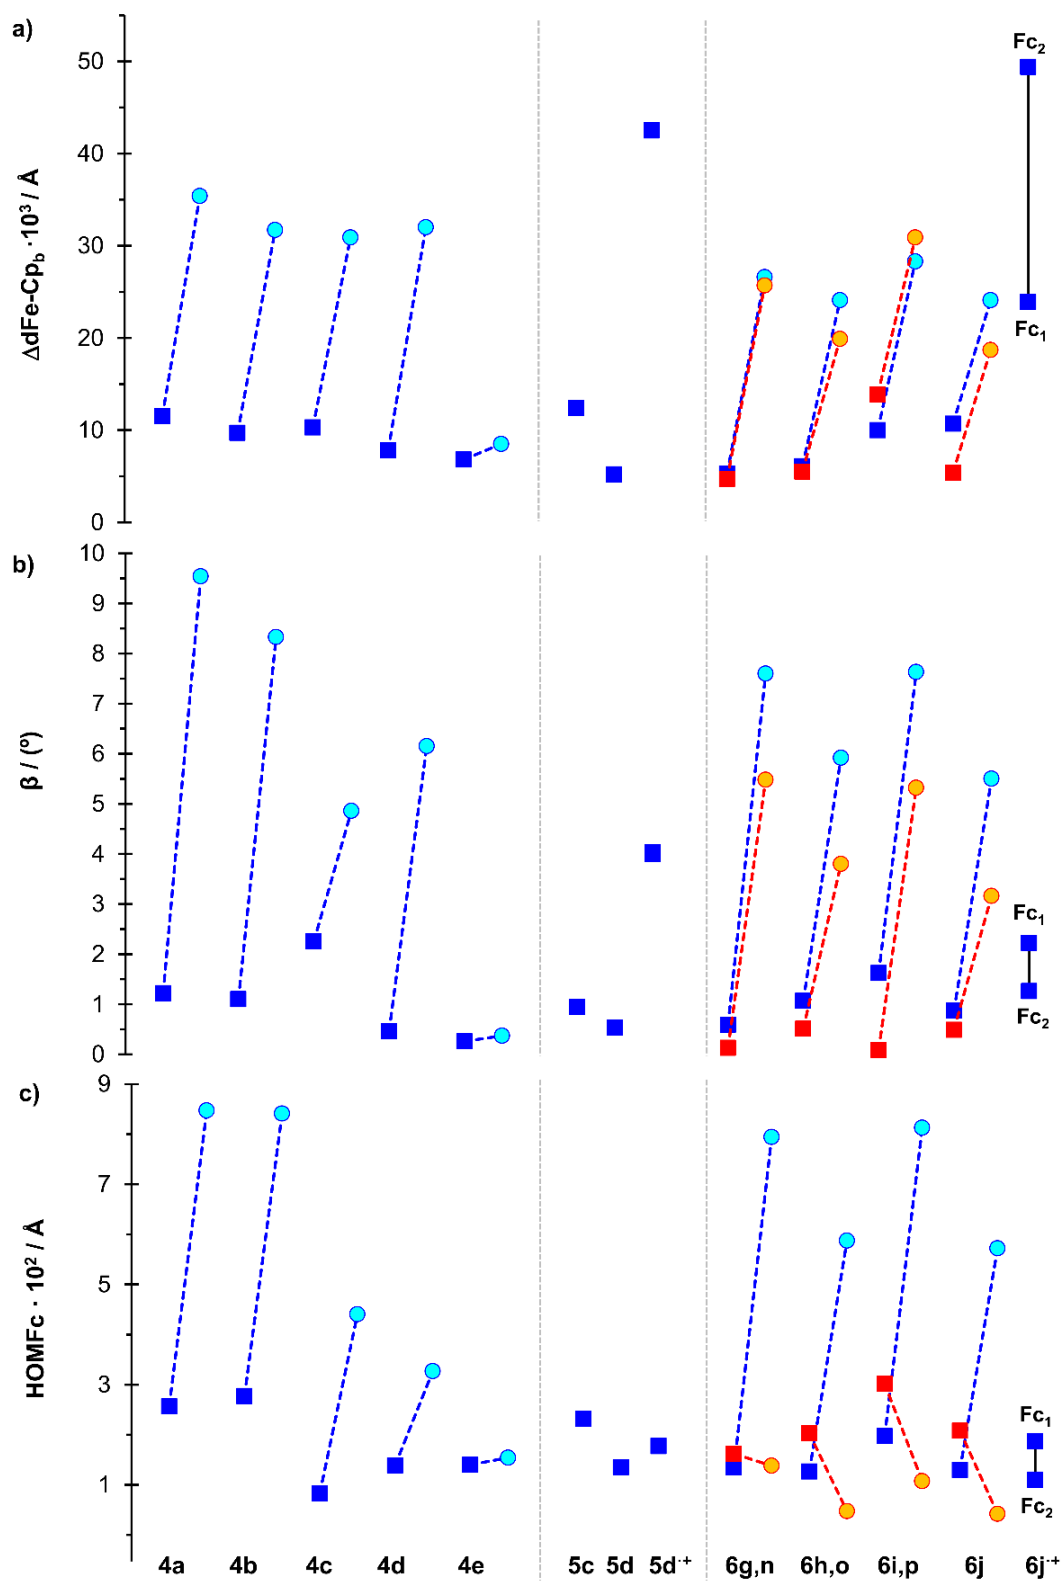

**Figure S1.** Calculated (B97-3c) ferrocene GDPs for compounds **4**, **5**, **6** and derivatives: a)  $\Delta d_{\text{Fe-Cp}_b}$  (Å); b)  $\beta_{\text{T}}$  (°); c) HOMFc (Å). Neutral and protonated species are represented by intense and lighter blue color, respectively. Regiosomers **6g-p** and their protonated counterparts are represented in red and yellow, respectively.

## Transformation of NN into CC virtual bonds

Model compounds **10** and **11** (Figure S2) were employed with the aim of converting NN bonds into virtual CC bonds.

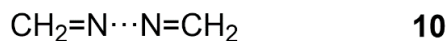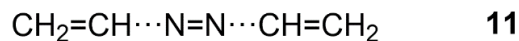

**Figure S2.** Structures used for computing distances for single and double NN links

Single NN ( $R_{N-N} = 1.3531 \text{ \AA}$ ) and double N=N ( $R_{N=N} = 1.2345 \text{ \AA}$ ) bond distances were obtained. From these constants, NN bonds were transformed into the virtual (equivalent) CC distances displaying the same PBO by using constant  $\gamma_{NN}$  which was defined as follows (equation 1):

$$R_{N-N} - R_{N=N} = \gamma_{NN} \ln 2 \quad (1)$$

From  $\gamma_{NN}$  (0.17105  $\text{\AA}$ ), PBOs were obtained for NN bonds as a function of their  $d_{NN}$  bond distances (equation 2):

$$\text{PBO}_{NN} = e^{(\gamma_{NN} - d_{NN}) / R_{N-N}} \quad (2)$$

Next, NN bonds were converted into the corresponding equivalent virtual CC distances as for CN bonds (equations 3 and 4):

$$\frac{\gamma_{CC} - d_{CC}}{R_{C-C}} = \frac{\gamma_{NN} - d_{NN}}{R_{N-N}} \quad (3)$$

$$d_{CC} = \gamma_{CC} - (\gamma_{NN} - d_{NN}) \frac{R_{C-C}}{R_{N-N}} \quad (4)$$

**Table S2.** Computed GEO, EN and HOMCEc parameters for compounds **5** and **6**.

| <b>Comp.</b>            | <b>B3LYP-D4/def2-TZVP</b> |                         |                             | <b>B97-3c</b>            |                         |                             |
|-------------------------|---------------------------|-------------------------|-----------------------------|--------------------------|-------------------------|-----------------------------|
|                         | <b>GEO<sup>[a]</sup></b>  | <b>EN<sup>[a]</sup></b> | <b>HOMCEc<sup>[a]</sup></b> | <b>GEO<sup>[a]</sup></b> | <b>EN<sup>[a]</sup></b> | <b>HOMCEc<sup>[a]</sup></b> |
| <b>5a</b>               | -0.2752                   | 0.2307                  | -0.04449                    | -0.2776                  | 0.2313                  | -0.04636                    |
| <b>5b</b>               | -0.1884                   | 0.3110                  | 0.12258                     | -0.1932                  | 0.2979                  | 0.10474                     |
| <b>5c</b>               | -0.1033                   | 0.3613                  | 0.25795                     | -0.0765                  | 0.3834                  | 0.30687                     |
| <b>5d</b>               | -0.1419                   | 0.3433                  | 0.20147                     | -0.1147                  | 0.3633                  | 0.24860                     |
| <b>5d<sup>+</sup></b>   | -0.0632                   | 0.4219                  | 0.35872                     | -0.0662                  | 0.4016                  | 0.33543                     |
| <b>6a</b>               | -0.2744                   | 0.2302                  | -0.04420                    | -0.2774                  | 0.2312                  | -0.04630                    |
| <b>6a·H<sup>+</sup></b> | -0.2451                   | 0.2111                  | -0.03401                    | -0.2774                  | 0.2312                  | -0.04630                    |
| <b>6b</b>               | -0.1929                   | 0.2876                  | 0.09463                     | -0.1793                  | 0.2900                  | 0.11073                     |
| <b>6b·H<sup>+</sup></b> | -0.1297                   | 0.2460                  | 0.11629                     | -0.1144                  | 0.2491                  | 0.13475                     |
| <b>6c</b>               | -0.1779                   | 0.2965                  | 0.11862                     | -0.1597                  | 0.3021                  | 0.14242                     |
| <b>6c·H<sup>+</sup></b> | -0.1002                   | 0.2713                  | 0.17113                     | -0.0812                  | 0.2742                  | 0.19298                     |
| <b>6d</b>               | -0.1189                   | 0.4542                  | 0.33538                     | -0.1157                  | 0.4629                  | 0.34718                     |
| <b>6d·H<sup>+</sup></b> | -0.1762                   | 0.2451                  | 0.06889                     | -0.2038                  | 0.2262                  | 0.02241                     |
| <b>6e</b>               | -0.3917                   | 0.1479                  | -0.24379                    | -0.5874                  | 0.0684                  | -0.51892                    |
| <b>6f</b>               | -0.2245                   | 0.3124                  | 0.08787                     | -0.2202                  | 0.3380                  | 0.11780                     |
| <b>6f·H<sup>+</sup></b> | -0.2186                   | 0.1592                  | -0.05945                    | -0.2124                  | 0.1606                  | -0.05182                    |
| <b>6g</b>               | -0.2175                   | 0.2568                  | 0.03926                     | -0.2050                  | 0.2576                  | 0.05255                     |
| <b>6g·H<sup>+</sup></b> | -0.0876                   | 0.3039                  | 0.21627                     | -0.0818                  | 0.2850                  | 0.20319                     |
| <b>6h</b>               | -0.1720                   | 0.3152                  | 0.14317                     | -0.1497                  | 0.3229                  | 0.17316                     |
| <b>6h·H<sup>+</sup></b> | -0.1033                   | 0.2824                  | 0.17915                     | -0.0802                  | 0.2780                  | 0.19783                     |
| <b>6i</b>               | -0.1065                   | 0.4094                  | 0.30285                     | -0.0838                  | 0.4254                  | 0.34162                     |
| <b>6i·H<sup>+</sup></b> | -0.0530                   | 0.2905                  | 0.23754                     | -0.0375                  | 0.2782                  | 0.24067                     |
| <b>6j</b>               | -0.1555                   | 0.3350                  | 0.17950                     | -0.1250                  | 0.3500                  | 0.22505                     |
| <b>6j·H<sup>+</sup></b> | -0.0899                   | 0.3083                  | 0.21846                     | -0.0641                  | 0.3030                  | 0.23891                     |
| <b>6j<sup>+</sup></b>   | -0.0546                   | 0.4449                  | 0.39026                     | -0.1260                  | 0.3492                  | 0.22315                     |

Table S2. Cont.

| Comp.                   | B3LYP-D/def2-TZVP  |                   |                       | B97-3c             |                   |                       |
|-------------------------|--------------------|-------------------|-----------------------|--------------------|-------------------|-----------------------|
|                         | GEO <sup>[a]</sup> | EN <sup>[a]</sup> | HOMCEc <sup>[a]</sup> | GEO <sup>[a]</sup> | EN <sup>[a]</sup> | HOMCEc <sup>[a]</sup> |
| <b>6k</b>               | -0.2641            | 0.2176            | -0.04652              | -0.2755            | 0.1813            | -0.09424              |
| <b>6k·H<sup>+</sup></b> | -0.2929            | 0.1338            | -0.15909              | -0.3024            | 0.1020            | -0.20046              |
| <b>6l</b>               | -0.3409            | 0.2081            | -0.13282              | -0.3435            | 0.1763            | -0.16714              |
| <b>6l·H<sup>+</sup></b> | -0.3618            | 0.1339            | -0.22787              | -0.3738            | 0.0994            | -0.27439              |
| <b>6m</b>               | -0.2484            | 0.2230            | -0.02543              | -0.2404            | 0.2219            | -0.01847              |
| <b>6m·H<sup>+</sup></b> | -0.1450            | 0.2600            | 0.11494               | -0.1442            | 0.2660            | 0.12177               |
| <b>6n</b>               | -0.2371            | 0.2598            | 0.02265               | -0.2250            | 0.2636            | 0.03852               |
| <b>6n·H<sup>+</sup></b> | -0.1726            | 0.2132            | 0.04060               | -0.1480            | 0.2027            | 0.05468               |
| <b>6o</b>               | -0.1624            | 0.3173            | 0.15485               | -0.1358            | 0.3285            | 0.19275               |
| <b>6o·H<sup>+</sup></b> | -0.0873            | 0.2954            | 0.20812               | -0.0644            | 0.2972            | 0.23279               |
| <b>6p</b>               | -0.1540            | 0.3389            | 0.18488               | -0.1093            | 0.3637            | 0.25438               |
| <b>6p·H<sup>+</sup></b> | -0.0796            | 0.3104            | 0.23079               | -0.0523            | 0.3237            | 0.27132               |

[a] In Å

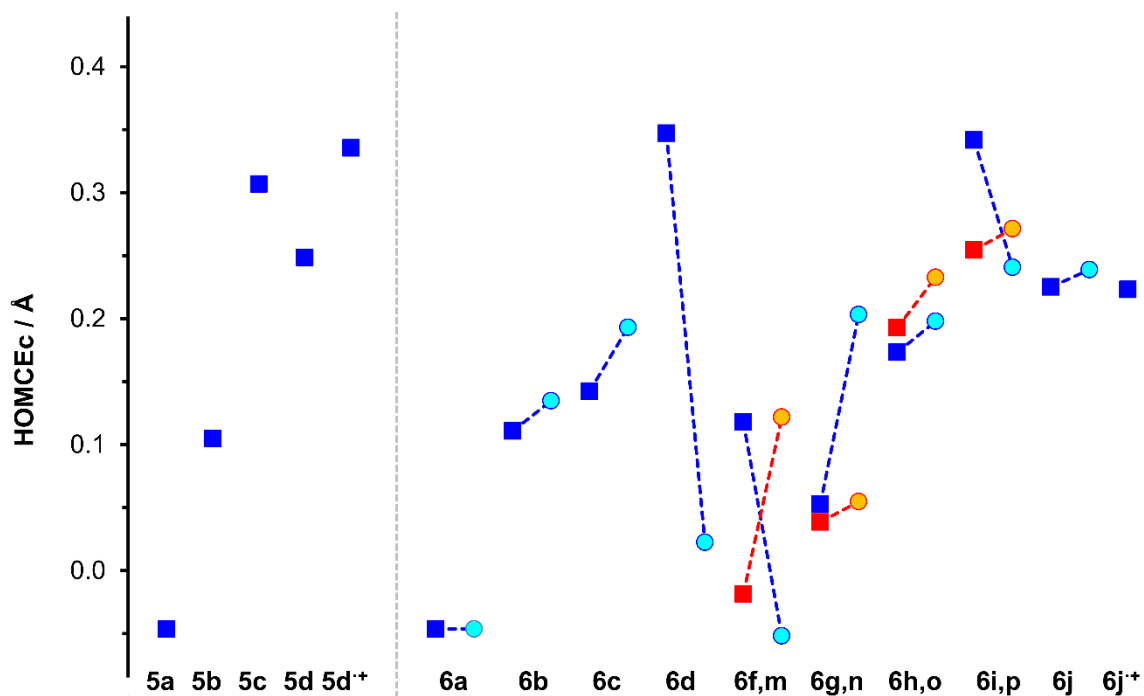

**Figure S3.** Calculated HOMCEc parameters (B97-3c) for the description of the bridge geometric distortion in compounds **5** and **6**. Type **I** compounds, in dark blue colour (left side of each imine pair) and their N-protonated **I·H<sup>+</sup>** derivatives (right side, light blue colour). Type **II** compounds and their N-protonated derivatives are represented in red (orange for N-protonation derivatives).



## Calculated structures

Cartesian coordinates (in Å) and electronic energies (in hartrees) are quoted at the (gas-phase) B3LYP-D4/def2-TZVP level.

### Ferrocene:

E = -1650.669893747134 au

|    |           |           |           |   |           |           |           |
|----|-----------|-----------|-----------|---|-----------|-----------|-----------|
| C  | -0.001858 | 0.008214  | 0.005487  | C | -0.035511 | 0.021169  | -3.351386 |
| C  | 1.421133  | 0.006036  | 0.014141  | C | -0.398568 | 1.397164  | -3.365210 |
| C  | 1.863154  | 1.358793  | 0.006852  | C | 0.797966  | 2.167693  | -3.365739 |
| C  | 0.713250  | 2.197119  | -0.006764 | C | 1.900504  | 1.267863  | -3.352276 |
| C  | -0.439467 | 1.362371  | -0.007662 | C | 1.385350  | -0.058740 | -3.343533 |
| H  | 2.052827  | -0.867292 | 0.003248  | H | -0.717076 | -0.813546 | -3.327477 |
| H  | 2.888753  | 1.690039  | -0.009536 | H | -1.403288 | 1.787332  | -3.353173 |
| H  | 0.714942  | 3.274620  | -0.035487 | H | 0.858408  | 3.243826  | -3.354206 |
| H  | -1.463779 | 1.696625  | -0.037874 | H | 2.942433  | 1.542954  | -3.328611 |
| H  | -0.637456 | -0.862101 | -0.014813 | H | 1.968687  | -0.964609 | -3.312166 |
| Fe | 0.721170  | 0.973510  | -1.676565 |   |           |           |           |

### Ferrocene<sup>+</sup>:

E = -1650.410343158888 au

|    |           |           |           |   |           |           |           |
|----|-----------|-----------|-----------|---|-----------|-----------|-----------|
| C  | 0.000351  | 0.011395  | 0.047743  | C | 0.044578  | -0.155995 | -3.354437 |
| C  | 1.425145  | 0.005212  | 0.061554  | C | -0.404963 | 1.194199  | -3.421439 |
| C  | 1.871860  | 1.356898  | 0.002406  | C | 0.741700  | 2.039302  | -3.449484 |
| C  | 0.723023  | 2.198323  | -0.047770 | C | 1.900243  | 1.211240  | -3.399644 |
| C  | -0.433416 | 1.366709  | -0.020010 | C | 1.469324  | -0.145588 | -3.340875 |
| H  | -0.637067 | -0.858010 | 0.059284  | H | -0.583134 | -1.030611 | -3.296783 |
| H  | 2.054784  | -0.869592 | 0.085062  | H | -1.432525 | 1.520401  | -3.423797 |
| H  | 2.898687  | 1.684074  | -0.026691 | H | 0.733958  | 3.117025  | -3.476640 |
| H  | 0.728280  | 3.273899  | -0.121313 | H | 2.922741  | 1.552501  | -3.382001 |
| H  | -1.456659 | 1.702741  | -0.068519 | H | 2.108727  | -1.010769 | -3.270797 |
| Fe | 0.733215  | 0.908102  | -1.692215 |   |           |           |           |

### 4a:

E = -2030.909892592258 au

|    |          |           |           |   |           |           |           |
|----|----------|-----------|-----------|---|-----------|-----------|-----------|
| C  | 0.765934 | -0.549795 | -1.145498 | H | 2.054988  | -1.127305 | 2.630068  |
| C  | 1.616236 | 0.379627  | -1.837347 | H | 4.536669  | -0.634564 | 1.711296  |
| C  | 2.908237 | -0.193223 | -1.933376 | H | 4.510074  | 1.763105  | 0.493606  |
| C  | 2.884705 | -1.465959 | -1.298365 | H | 2.004517  | 2.744331  | 0.645264  |
| C  | 1.573127 | -1.691126 | -0.813681 | C | -0.639750 | -0.397955 | -0.800487 |
| H  | 1.317999 | 1.347250  | -2.196144 | C | -1.427471 | -1.463873 | -0.537442 |
| H  | 3.769809 | 0.273672  | -2.382276 | C | -1.247274 | 0.972912  | -0.714143 |
| H  | 3.724592 | -2.130535 | -1.178019 | C | -2.834823 | -1.354646 | -0.149293 |
| H  | 1.246697 | -2.555450 | -0.259673 | H | -1.048843 | -2.475173 | -0.609476 |
| Fe | 2.336310 | 0.015111  | 0.055495  | C | -2.676453 | 1.077542  | -0.341471 |
| C  | 1.552879 | 0.871361  | 1.768783  | C | -3.418771 | 0.003646  | -0.071334 |
| C  | 2.374848 | -0.237525 | 2.112684  | H | -3.065840 | 2.087386  | -0.299863 |
| C  | 3.687304 | 0.023724  | 1.627355  | H | -4.463086 | 0.063917  | 0.209445  |
| C  | 3.673325 | 1.293457  | 0.984685  | O | -0.608426 | 1.987496  | -0.925663 |
| C  | 2.352452 | 1.817047  | 1.069251  | O | -3.512759 | -2.341398 | 0.096244  |
| H  | 0.498795 | 0.965020  | 1.973496  |   |           |           |           |

**4b:**

E = -2184.546094662353 au

|    |          |           |           |   |           |           |           |
|----|----------|-----------|-----------|---|-----------|-----------|-----------|
| C  | 0.737433 | -0.534357 | -1.149218 | H | 1.992537  | 2.763758  | 0.608186  |
| C  | 1.602395 | 0.377491  | -1.846091 | C | -0.669207 | -0.365932 | -0.810787 |
| C  | 2.888710 | -0.210444 | -1.927223 | C | -1.462521 | -1.432212 | -0.565918 |
| C  | 2.847380 | -1.475553 | -1.277946 | C | -1.253762 | 1.012256  | -0.716377 |
| C  | 1.530058 | -1.680941 | -0.800287 | C | -2.868497 | -1.346543 | -0.172580 |
| H  | 1.316856 | 1.344080  | -2.217280 | H | -1.081203 | -2.441241 | -0.656455 |
| H  | 3.758137 | 0.241950  | -2.375886 | C | -2.684687 | 1.137787  | -0.325303 |
| H  | 3.679197 | -2.147659 | -1.144067 | C | -3.465453 | 0.008864  | -0.057791 |
| H  | 1.190681 | -2.534810 | -0.237899 | O | -0.585541 | 2.004555  | -0.940353 |
| Fe | 2.305848 | 0.026551  | 0.055226  | O | -3.519717 | -2.356944 | 0.047537  |
| C  | 1.516076 | 0.909338  | 1.751259  | C | -4.798849 | 0.154916  | 0.311858  |
| C  | 2.325601 | -0.202376 | 2.115234  | C | -3.249011 | 2.407718  | -0.220730 |
| C  | 3.644266 | 0.041565  | 1.637715  | C | -4.578177 | 2.548369  | 0.148224  |
| C  | 3.646665 | 1.303767  | 0.980023  | H | -5.013507 | 3.536270  | 0.228912  |
| C  | 2.329719 | 1.839644  | 1.047405  | C | -5.353792 | 1.421885  | 0.414814  |
| H  | 0.461075 | 1.014626  | 1.945264  | H | -6.391326 | 1.535472  | 0.702369  |
| H  | 1.993549 | -1.083234 | 2.640175  | H | -5.379922 | -0.735020 | 0.512431  |
| H  | 4.487110 | -0.623030 | 1.736495  | H | -2.630713 | 3.269325  | -0.431845 |
| H  | 4.491502 | 1.760162  | 0.490272  |   |           |           |           |

**4c:**

E = -2184.531845970583 au

|    |          |           |           |   |           |           |           |
|----|----------|-----------|-----------|---|-----------|-----------|-----------|
| C  | 0.817904 | -0.542454 | -1.229292 | H | 1.759080  | 2.677675  | 0.943988  |
| C  | 1.672252 | 0.438250  | -1.825810 | C | -0.629061 | -0.373480 | -1.014466 |
| C  | 2.992521 | -0.081524 | -1.861424 | C | -1.591830 | -1.363548 | -1.297704 |
| C  | 2.968166 | -1.377228 | -1.275018 | C | -1.076008 | 0.842773  | -0.484901 |
| C  | 1.635448 | -1.655593 | -0.878383 | C | -1.269741 | -2.598447 | -2.068450 |
| H  | 1.354866 | 1.398028  | -2.200111 | C | -2.938226 | -1.144446 | -0.935861 |
| H  | 3.862053 | 0.426491  | -2.245337 | C | -2.408596 | 1.071494  | -0.190088 |
| H  | 3.818977 | -2.021917 | -1.126546 | H | -0.341162 | 1.607447  | -0.276796 |
| H  | 1.296266 | -2.554619 | -0.392776 | C | -2.299360 | -3.662848 | -2.129632 |
| Fe | 2.321253 | 0.032298  | 0.093665  | C | -3.977277 | -2.198512 | -1.120764 |
| C  | 1.471409 | 0.664105  | 1.874620  | C | -3.341526 | 0.065394  | -0.388232 |
| C  | 2.395210 | -0.387858 | 2.121705  | H | -2.714513 | 2.025741  | 0.219785  |
| C  | 3.674792 | 0.033878  | 1.663116  | C | -3.550318 | -3.481742 | -1.704575 |
| C  | 3.541800 | 1.347155  | 1.132957  | H | -1.972934 | -4.582095 | -2.600902 |
| C  | 2.179330 | 1.737476  | 1.263015  | H | -4.383712 | 0.196177  | -0.132362 |
| H  | 0.415172 | 0.638945  | 2.088048  | H | -4.315286 | -4.243844 | -1.789918 |
| H  | 2.161779 | -1.346178 | 2.556170  | O | -5.138969 | -2.023797 | -0.796076 |
| H  | 4.580660 | -0.549678 | 1.688518  | O | -0.237940 | -2.752383 | -2.696363 |
| H  | 4.329346 | 1.933917  | 0.688854  |   |           |           |           |

**4d:**

E = -2184.544000314708 au

|   |          |           |           |    |          |           |           |
|---|----------|-----------|-----------|----|----------|-----------|-----------|
| C | 0.717601 | -0.537988 | -1.131521 | H  | 3.701082 | -2.065006 | -1.244971 |
| C | 1.538322 | 0.416851  | -1.816362 | H  | 1.244915 | -2.549746 | -0.295729 |
| C | 2.843145 | -0.124919 | -1.943581 | Fe | 2.305917 | 0.032246  | 0.055003  |
| C | 2.849499 | -1.410742 | -1.335679 | C  | 1.524816 | 0.822088  | 1.799713  |
| C | 1.546023 | -1.668332 | -0.837199 | C  | 2.369484 | -0.282134 | 2.100740  |
| H | 1.218379 | 1.379826  | -2.178153 | C  | 3.673024 | 0.015906  | 1.612536  |
| H | 3.687126 | 0.363974  | -2.402058 | C  | 3.632825 | 1.304487  | 1.010307  |

|   |           |           |           |   |           |           |           |
|---|-----------|-----------|-----------|---|-----------|-----------|-----------|
| C | 2.304355  | 1.803002  | 1.125980  | C | -3.389017 | -0.043409 | -0.047343 |
| H | 0.469441  | 0.888445  | 2.009543  | C | -4.810196 | 0.120805  | 0.330988  |
| H | 2.069032  | -1.193798 | 2.590943  | C | -3.174198 | 2.441489  | -0.326093 |
| H | 4.533734  | -0.630480 | 1.668394  | C | -4.599563 | 2.564288  | 0.048606  |
| H | 4.457699  | 1.805298  | 0.530155  | H | -4.992465 | 3.573791  | 0.064957  |
| H | 1.945389  | 2.747176  | 0.749863  | C | -5.349347 | 1.500336  | 0.349942  |
| C | -0.687963 | -0.367462 | -0.765419 | H | -6.393071 | 1.588059  | 0.627033  |
| C | -1.491033 | -1.471399 | -0.446530 | H | -0.686850 | 1.785348  | -0.945610 |
| C | -1.268972 | 0.902524  | -0.722585 | H | -3.436169 | -2.166521 | 0.152975  |
| C | -2.818343 | -1.312519 | -0.090510 | O | -2.515326 | 3.434010  | -0.582419 |
| H | -1.069285 | -2.466473 | -0.492910 | O | -5.527334 | -0.822688 | 0.619411  |
| C | -2.598633 | 1.070186  | -0.369803 |   |           |           |           |

4e:

E = -2338.179508914748 au

|    |           |           |           |   |           |           |           |
|----|-----------|-----------|-----------|---|-----------|-----------|-----------|
| C  | 0.663571  | -0.508370 | -1.126354 | C | -1.320819 | 0.926377  | -0.691688 |
| C  | 1.479567  | 0.451534  | -1.809373 | C | -2.868432 | -1.292122 | -0.083051 |
| C  | 2.784579  | -0.087615 | -1.946305 | H | -1.123094 | -2.444123 | -0.503897 |
| C  | 2.795607  | -1.377160 | -1.346292 | C | -2.650408 | 1.093793  | -0.332567 |
| C  | 1.494750  | -1.639414 | -0.843085 | C | -3.440673 | -0.022734 | -0.022091 |
| H  | 1.155945  | 1.416268  | -2.163131 | C | -4.862375 | 0.118257  | 0.363346  |
| H  | 3.625676  | 0.405187  | -2.405931 | C | -3.207312 | 2.471535  | -0.273444 |
| H  | 3.648452  | -2.030898 | -1.263835 | C | -4.638227 | 2.614658  | 0.103100  |
| H  | 1.197063  | -2.524382 | -0.305482 | C | -5.425818 | 1.495603  | 0.405435  |
| Fe | 2.257307  | 0.056675  | 0.055764  | C | -6.763830 | 1.667473  | 0.755209  |
| C  | 1.482046  | 0.832394  | 1.809345  | C | -5.199223 | 3.889874  | 0.154729  |
| C  | 2.333596  | -0.269540 | 2.099274  | C | -7.313988 | 2.938313  | 0.803003  |
| C  | 3.633074  | 0.037467  | 1.605746  | H | -8.354164 | 3.066430  | 1.074579  |
| C  | 3.583483  | 1.329399  | 1.011335  | C | -6.530504 | 4.051481  | 0.502287  |
| C  | 2.253290  | 1.820914  | 1.137256  | H | -6.962324 | 5.043521  | 0.540158  |
| H  | 0.427382  | 0.892407  | 2.024564  | H | -7.352025 | 0.789677  | 0.985216  |
| H  | 2.040089  | -1.185552 | 2.585582  | H | -4.572035 | 4.738367  | -0.082177 |
| H  | 4.497112  | -0.605165 | 1.653067  | H | -3.487238 | -2.147522 | 0.151811  |
| H  | 4.403313  | 1.836869  | 0.529509  | H | -0.739255 | 1.811701  | -0.904845 |
| H  | 1.887350  | 2.765195  | 0.768195  | O | -5.549750 | -0.851696 | 0.635409  |
| C  | -0.740592 | -0.341414 | -0.752593 | O | -2.518389 | 3.445495  | -0.521914 |
| C  | -1.543617 | -1.449139 | -0.444281 |   |           |           |           |

4a·H<sup>+</sup>:

E = -2031.269343238665 au

|    |           |           |           |   |           |           |           |
|----|-----------|-----------|-----------|---|-----------|-----------|-----------|
| C  | 0.073628  | -0.000669 | 0.190309  | C | 1.292046  | -0.128296 | -3.304879 |
| C  | 1.521119  | -0.008397 | 0.064288  | H | -0.803447 | -0.890606 | -3.323262 |
| C  | 1.952933  | 1.327561  | -0.002486 | H | -1.513242 | 1.700617  | -3.258510 |
| C  | 0.818526  | 2.186267  | 0.044385  | H | 0.741819  | 3.169704  | -3.205720 |
| C  | -0.336925 | 1.395324  | 0.151892  | H | 2.833250  | 1.486011  | -3.244980 |
| H  | 2.142078  | -0.883122 | 0.042169  | H | 1.880181  | -1.031080 | -3.310069 |
| H  | 2.976981  | 1.646692  | -0.108628 | C | -0.813108 | -1.081501 | -0.022057 |
| H  | 0.839697  | 3.261513  | -0.026229 | C | -2.197686 | -0.933682 | 0.120046  |
| H  | -1.345136 | 1.769554  | 0.194387  | C | -0.284470 | -2.456990 | -0.398346 |
| Fe | 0.640645  | 0.855728  | -1.588155 | C | -3.054588 | -1.991161 | -0.096472 |
| C  | -0.126914 | -0.050573 | -3.318742 | H | -2.610579 | 0.015035  | 0.437199  |
| C  | -0.505877 | 1.318460  | -3.270013 | C | -1.275142 | -3.522469 | -0.638748 |
| C  | 0.686257  | 2.094342  | -3.251640 | C | -2.586555 | -3.302091 | -0.498860 |
| C  | 1.793739  | 1.202815  | -3.274343 | H | -0.872449 | -4.486217 | -0.920057 |

|   |           |           |           |   |           |           |          |
|---|-----------|-----------|-----------|---|-----------|-----------|----------|
| H | -3.330287 | -4.071636 | -0.660019 | O | -4.368339 | -1.914436 | 0.054363 |
| O | 0.900630  | -2.689054 | -0.514605 | H | -4.659111 | -1.035196 | 0.340047 |

**4b·H<sup>+</sup>:**

E = -2184.911571300528 au

|    |          |           |           |   |           |           |           |
|----|----------|-----------|-----------|---|-----------|-----------|-----------|
| C  | 0.729148 | -0.511662 | -1.325680 | H | 1.874312  | 2.717959  | 0.824764  |
| C  | 1.633266 | 0.480115  | -1.882198 | C | -0.602531 | -0.323797 | -0.880404 |
| C  | 2.921985 | -0.082027 | -1.914890 | C | -1.367601 | -1.391467 | -0.416174 |
| C  | 2.871559 | -1.391270 | -1.359315 | C | -1.241706 | 1.053064  | -0.906073 |
| C  | 1.544869 | -1.666402 | -0.985170 | C | -2.672329 | -1.236515 | 0.019068  |
| H  | 1.353592 | 1.458571  | -2.221773 | H | -0.949411 | -2.390128 | -0.424239 |
| H  | 3.810022 | 0.415448  | -2.269238 | C | -2.639811 | 1.167134  | -0.426624 |
| H  | 3.713999 | -2.048087 | -1.216720 | C | -3.343965 | 0.042291  | 0.036406  |
| H  | 1.206145 | -2.577309 | -0.522444 | O | -0.627606 | 2.027183  | -1.285609 |
| Fe | 2.166481 | 0.009354  | 0.048885  | O | -3.396497 | -2.266661 | 0.432478  |
| C  | 1.402987 | 0.783639  | 1.836884  | C | -4.658946 | 0.175596  | 0.484792  |
| C  | 2.205551 | -0.358835 | 2.101747  | C | -3.261620 | 2.408541  | -0.438279 |
| C  | 3.516663 | -0.085795 | 1.621496  | C | -4.572661 | 2.536437  | 0.009360  |
| C  | 3.516053 | 1.217788  | 1.054294  | H | -5.051986 | 3.506286  | -0.003410 |
| C  | 2.204417 | 1.755093  | 1.177794  | C | -5.267614 | 1.423642  | 0.469954  |
| H  | 0.352475 | 0.881264  | 2.060890  | H | -6.287194 | 1.526357  | 0.816510  |
| H  | 1.881472 | -1.267199 | 2.582246  | H | -5.197438 | -0.691441 | 0.839006  |
| H  | 4.358528 | -0.757569 | 1.660466  | H | -2.710715 | 3.264880  | -0.801758 |
| H  | 4.356437 | 1.702758  | 0.585046  | H | -2.904138 | -3.099262 | 0.389497  |

**4c·H<sup>+</sup>:**

E = -2184.890836717127 au

|    |          |           |           |   |           |           |           |
|----|----------|-----------|-----------|---|-----------|-----------|-----------|
| C  | 0.805005 | -0.558627 | -1.199715 | H | 1.844283  | 2.738265  | 0.887767  |
| C  | 1.664790 | 0.416629  | -1.824346 | C | -0.631112 | -0.393724 | -0.986799 |
| C  | 2.977502 | -0.111906 | -1.865246 | C | -1.596813 | -1.407966 | -1.253213 |
| C  | 2.974098 | -1.385803 | -1.237359 | C | -1.093589 | 0.833429  | -0.491770 |
| C  | 1.646911 | -1.670723 | -0.811391 | C | -1.333503 | -2.575468 | -2.035857 |
| H  | 1.341821 | 1.357673  | -2.238226 | C | -2.953211 | -1.199818 | -0.862493 |
| H  | 3.839737 | 0.385750  | -2.277521 | C | -2.418376 | 1.033568  | -0.166477 |
| H  | 3.832812 | -2.017005 | -1.079529 | H | -0.371492 | 1.618142  | -0.319185 |
| H  | 1.330467 | -2.542762 | -0.261090 | C | -2.345448 | -3.566934 | -2.317851 |
| Fe | 2.294851 | 0.045478  | 0.097668  | C | -3.992515 | -2.247435 | -1.078287 |
| C  | 1.503160 | 0.763378  | 1.884508  | C | -3.347788 | 0.000286  | -0.318622 |
| C  | 2.391885 | -0.311811 | 2.147787  | H | -2.736590 | 1.988857  | 0.230265  |
| C  | 3.674363 | 0.048234  | 1.650330  | C | -3.595664 | -3.438000 | -1.854572 |
| C  | 3.577184 | 1.346558  | 1.080542  | H | -2.028852 | -4.416199 | -2.909424 |
| C  | 2.233281 | 1.789755  | 1.220990  | H | -4.384673 | 0.131130  | -0.040619 |
| H  | 0.453892 | 0.786740  | 2.131137  | H | -4.360892 | -4.182502 | -2.032431 |
| H  | 2.136470 | -1.243039 | 2.626534  | O | -5.122926 | -2.134289 | -0.652507 |
| H  | 4.561007 | -0.563570 | 1.682292  | O | -0.198119 | -2.843194 | -2.609946 |
| H  | 4.376737 | 1.890272  | 0.604430  | H | 0.513267  | -2.210024 | -2.357162 |

**4d·H<sup>+</sup>:**

E = -2184.899980914851 au

|   |          |           |           |   |          |           |           |
|---|----------|-----------|-----------|---|----------|-----------|-----------|
| C | 0.685883 | -0.481778 | -1.220436 | C | 2.833975 | -1.310995 | -1.417087 |
| C | 1.530005 | 0.546869  | -1.787330 | C | 1.531355 | -1.624479 | -0.973519 |
| C | 2.830841 | 0.018617  | -1.922354 | H | 1.222007 | 1.533200  | -2.089326 |

|    |           |           |           |   |           |           |           |
|----|-----------|-----------|-----------|---|-----------|-----------|-----------|
| H  | 3.685233  | 0.546594  | -2.312842 | C | -1.311780 | 0.940582  | -0.881316 |
| H  | 3.692259  | -1.959642 | -1.355902 | C | -2.723916 | -1.255181 | 0.105610  |
| H  | 1.230945  | -2.558717 | -0.530832 | H | -0.965229 | -2.387047 | -0.220333 |
| Fe | 2.212743  | 0.017563  | 0.079037  | C | -2.610813 | 1.111824  | -0.489001 |
| C  | 1.521237  | 0.681378  | 1.932849  | C | -3.357560 | 0.008132  | 0.013085  |
| C  | 2.349233  | -0.460546 | 2.101318  | C | -4.690729 | 0.210401  | 0.384962  |
| C  | 3.635133  | -0.144797 | 1.579646  | C | -3.236597 | 2.462511  | -0.593192 |
| C  | 3.596258  | 1.187726  | 1.086808  | C | -4.653240 | 2.568694  | -0.185757 |
| C  | 2.285797  | 1.699325  | 1.298173  | H | -5.111571 | 3.544942  | -0.273218 |
| H  | 0.479333  | 0.750286  | 2.202730  | C | -5.325999 | 1.500892  | 0.274531  |
| H  | 2.055410  | -1.400080 | 2.539588  | H | -6.365099 | 1.586180  | 0.575464  |
| H  | 4.484739  | -0.806914 | 1.545310  | H | -0.778483 | 1.801262  | -1.257605 |
| H  | 4.410728  | 1.709878  | 0.611863  | H | -3.283964 | -2.101183 | 0.478896  |
| H  | 1.935909  | 2.681336  | 1.025193  | O | -2.626109 | 3.436701  | -0.985162 |
| C  | -0.671997 | -0.322026 | -0.792992 | O | -5.377249 | -0.821639 | 0.847274  |
| C  | -1.422718 | -1.410710 | -0.284358 | H | -6.290038 | -0.588717 | 1.071334  |

**4e·H<sup>+</sup>:**

**E = -2338.528558509814 au**

|    |           |           |           |   |           |           |           |
|----|-----------|-----------|-----------|---|-----------|-----------|-----------|
| C  | 0.681717  | -0.175518 | -1.127827 | C | -1.423041 | 1.117009  | -0.864816 |
| C  | 1.542080  | 0.890236  | -1.564246 | C | -2.639561 | -1.000434 | 0.453318  |
| C  | 2.804340  | 0.335669  | -1.886558 | H | -0.798445 | -2.031776 | 0.175463  |
| C  | 2.747755  | -1.065139 | -1.653490 | C | -2.743967 | 1.243406  | -0.417297 |
| C  | 1.452778  | -1.386997 | -1.181512 | C | -3.361041 | 0.169890  | 0.260899  |
| H  | 1.295937  | 1.938140  | -1.616148 | C | -4.747845 | 0.268725  | 0.765788  |
| H  | 3.667088  | 0.886840  | -2.222375 | C | -3.502854 | 2.442279  | -0.638938 |
| H  | 3.558099  | -1.761978 | -1.789906 | C | -4.842946 | 2.610497  | -0.166957 |
| H  | 1.110744  | -2.375642 | -0.925356 | C | -5.466995 | 1.550938  | 0.526834  |
| Fe | 2.317967  | -0.034636 | 0.106877  | C | -6.762885 | 1.704329  | 0.985081  |
| C  | 1.696637  | 0.290218  | 2.058513  | C | -5.540135 | 3.810508  | -0.388379 |
| C  | 2.461227  | -0.906646 | 1.985135  | C | -7.444409 | 2.899056  | 0.763203  |
| C  | 3.756491  | -0.569131 | 1.503407  | H | -8.457924 | 3.011348  | 1.125916  |
| C  | 3.791812  | 0.834291  | 1.280290  | C | -6.834344 | 3.948598  | 0.078745  |
| C  | 2.518097  | 1.367041  | 1.622989  | H | -7.371921 | 4.871904  | -0.088796 |
| H  | 0.667423  | 0.364390  | 2.371940  | H | -7.227966 | 0.882941  | 1.512720  |
| H  | 2.118358  | -1.896905 | 2.236975  | H | -5.063144 | 4.620668  | -0.920393 |
| H  | 4.563203  | -1.259587 | 1.319409  | H | -3.118940 | -1.821757 | 0.968532  |
| H  | 4.630525  | 1.392784  | 0.898119  | H | -0.926701 | 1.922023  | -1.393592 |
| H  | 2.226847  | 2.402546  | 1.555828  | O | -5.279935 | -0.650729 | 1.353320  |
| C  | -0.687894 | -0.052355 | -0.662052 | O | -3.001591 | 3.458383  | -1.293287 |
| C  | -1.337417 | -1.111361 | 0.001098  | H | -2.100673 | 3.291458  | -1.609244 |

**5a:**

**E = -78.568781709483 au**

|   |           |          |           |   |           |           |           |
|---|-----------|----------|-----------|---|-----------|-----------|-----------|
| C | 0.079077  | 0.585006 | 0.000000  | C | 0.054052  | -0.739746 | -0.000000 |
| H | -0.831576 | 1.172472 | 0.000000  | H | 0.964708  | -1.327208 | 0.000000  |
| H | 1.011262  | 1.137666 | -0.000000 | H | -0.878130 | -1.292411 | -0.000000 |

**5b:**

**E = -338.446231814569 au**

|   |          |           |           |   |           |           |          |
|---|----------|-----------|-----------|---|-----------|-----------|----------|
| C | 0.204715 | 0.384147  | -0.440370 | C | -0.039211 | -0.497375 | 0.547627 |
| H | 0.454451 | -0.007808 | -1.418342 | H | -0.297844 | -0.260665 | 1.566424 |

|   |           |          |           |   |           |           |           |
|---|-----------|----------|-----------|---|-----------|-----------|-----------|
| N | 0.168050  | 1.726788 | -0.329359 | N | 0.037339  | -1.897971 | 0.281602  |
| H | -0.055867 | 2.179721 | 0.539293  | O | -0.195440 | -2.646665 | 1.228376  |
| H | 0.363356  | 2.309966 | -1.120900 | O | 0.324355  | -2.287807 | -0.850037 |

**5c:**

E = -2108.297777430373 au

|    |           |           |           |   |           |           |           |
|----|-----------|-----------|-----------|---|-----------|-----------|-----------|
| Fe | -0.034577 | 0.125155  | -0.089234 | H | -2.669785 | -0.625506 | 0.607191  |
| C  | 2.007086  | 0.045675  | 0.197884  | H | -1.075204 | -2.451183 | -0.555708 |
| C  | 1.573087  | 1.394672  | 0.251857  | C | 1.402587  | -2.097486 | 1.528691  |
| C  | 0.623520  | 1.516096  | 1.305982  | H | 0.667147  | -2.475542 | 2.223908  |
| C  | 0.468560  | 0.241166  | 1.904864  | C | 2.307772  | -2.946848 | 1.002092  |
| C  | 1.333520  | -0.686239 | 1.231995  | H | 3.056541  | -2.543720 | 0.326568  |
| H  | 2.705259  | -0.360509 | -0.515101 | C | 2.439367  | -4.366242 | 1.234815  |
| H  | 1.885872  | 2.185284  | -0.410651 | C | 1.458782  | -5.141449 | 2.072607  |
| H  | 0.096873  | 2.414781  | 1.582590  | C | 3.470686  | -5.049651 | 0.675057  |
| H  | -0.188753 | -0.005811 | 2.723056  | C | 1.719494  | -6.583201 | 2.291299  |
| C  | -0.464736 | -0.777808 | -1.901776 | C | 3.701767  | -6.479079 | 0.862587  |
| C  | -0.861662 | 0.589317  | -1.930438 | H | 4.196248  | -4.541454 | 0.050565  |
| C  | -1.822282 | 0.789749  | -0.900153 | C | 2.751173  | -7.212904 | 1.729318  |
| C  | -2.018733 | -0.452705 | -0.234160 | H | 0.998649  | -7.084980 | 2.925087  |
| C  | -1.181037 | -1.420909 | -0.854771 | H | 2.943899  | -8.269411 | 1.869631  |
| H  | 0.266389  | -1.239648 | -2.545018 | O | 0.461420  | -4.640005 | 2.559684  |
| H  | -0.484029 | 1.345019  | -2.599802 | O | 4.641896  | -7.058268 | 0.336242  |
| H  | -2.298758 | 1.724130  | -0.651763 |   |           |           |           |

**5d:**

E = -3377.547655977676 au

|    |           |           |           |    |           |           |           |
|----|-----------|-----------|-----------|----|-----------|-----------|-----------|
| C  | -0.074069 | -0.090293 | 0.001464  | H  | 2.302457  | -2.752921 | 5.808265  |
| C  | 0.018771  | 0.077266  | 1.327216  | H  | -0.232885 | -2.309002 | 5.026834  |
| H  | 0.827554  | -0.293428 | -0.568164 | C  | -1.298712 | -0.030190 | -0.775885 |
| H  | -0.881825 | 0.282049  | 1.897935  | C  | -2.594556 | 0.412330  | -0.358004 |
| C  | 1.244312  | 0.017844  | 2.102754  | C  | -3.483345 | 0.311914  | -1.462202 |
| C  | 1.362956  | 0.400130  | 3.477606  | C  | -2.749203 | -0.180265 | -2.577391 |
| C  | 2.704389  | 0.190025  | 3.894534  | C  | -1.407746 | -0.386138 | -2.158647 |
| C  | 3.428584  | -0.332509 | 2.786673  | H  | -2.850226 | 0.782509  | 0.621183  |
| C  | 2.533810  | -0.446288 | 1.688535  | H  | -4.525260 | 0.588330  | -1.461865 |
| H  | 0.557913  | 0.775172  | 4.089529  | H  | -3.136989 | -0.346463 | -3.569192 |
| H  | 3.098322  | 0.372654  | 4.881021  | H  | -0.596659 | -0.740432 | -2.774945 |
| H  | 4.467423  | -0.620242 | 2.787609  | Fe | -1.923759 | 1.596350  | -1.908753 |
| H  | 2.781123  | -0.840533 | 0.716616  | C  | -0.503152 | 3.084801  | -1.693527 |
| Fe | 1.857731  | -1.591368 | 3.266151  | C  | -0.663220 | 2.758230  | -3.069671 |
| C  | 0.445958  | -3.087216 | 3.045685  | C  | -2.018752 | 3.005616  | -3.426320 |
| C  | 1.719405  | -3.549480 | 2.612411  | C  | -2.696903 | 3.483831  | -2.270190 |
| C  | 2.617023  | -3.466183 | 3.714636  | C  | -1.759468 | 3.532575  | -1.199417 |
| C  | 1.897197  | -2.952150 | 4.829526  | H  | 0.399326  | 2.973177  | -1.114557 |
| C  | 0.555673  | -2.717332 | 4.415802  | H  | 0.102121  | 2.369572  | -3.721671 |
| H  | -0.434769 | -2.994350 | 2.430986  | H  | -2.459854 | 2.837134  | -4.395290 |
| H  | 1.966669  | -3.880396 | 1.616872  | H  | -3.741601 | 3.742408  | -2.210152 |
| H  | 3.663066  | -3.725941 | 3.701145  | H  | -1.969748 | 3.831909  | -0.185553 |

**5d<sup>+</sup>:**

E = -3377.329109457205 au

|    |           |           |           |    |           |           |           |
|----|-----------|-----------|-----------|----|-----------|-----------|-----------|
| C  | -0.194559 | -0.096453 | 0.037678  | H  | 2.467274  | -2.766529 | 5.794036  |
| C  | -0.086287 | 0.171466  | 1.361990  | H  | -0.130432 | -2.550073 | 5.129948  |
| H  | 0.695667  | -0.393680 | -0.508456 | C  | -1.391495 | -0.035120 | -0.741646 |
| H  | -0.965980 | 0.470056  | 1.919844  | C  | -2.678766 | 0.484308  | -0.361165 |
| C  | 1.139060  | 0.113501  | 2.098782  | C  | -3.532338 | 0.406190  | -1.486827 |
| C  | 1.273815  | 0.407491  | 3.494511  | C  | -2.794372 | -0.136575 | -2.576997 |
| C  | 2.625189  | 0.209116  | 3.884914  | C  | -1.477547 | -0.395905 | -2.134388 |
| C  | 3.338988  | -0.263981 | 2.748692  | H  | -2.949823 | 0.870722  | 0.607280  |
| C  | 2.422940  | -0.363973 | 1.667345  | H  | -4.558811 | 0.732381  | -1.522463 |
| H  | 0.473825  | 0.747249  | 4.133234  | H  | -3.168424 | -0.293850 | -3.575159 |
| H  | 3.032842  | 0.380842  | 4.867891  | H  | -0.673024 | -0.803201 | -2.725544 |
| H  | 4.385966  | -0.518627 | 2.714830  | Fe | -1.878976 | 1.609386  | -1.893072 |
| H  | 2.665238  | -0.717793 | 0.678829  | C  | -0.437631 | 3.097343  | -1.711573 |
| Fe | 1.853996  | -1.609021 | 3.263342  | C  | -0.579505 | 2.718253  | -3.074973 |
| C  | 0.517966  | -3.297737 | 3.134434  | C  | -1.926300 | 2.967737  | -3.458981 |
| C  | 1.798529  | -3.640519 | 2.635468  | C  | -2.615054 | 3.495684  | -2.333022 |
| C  | 2.743717  | -3.461837 | 3.686874  | C  | -1.694975 | 3.574012  | -1.250127 |
| C  | 2.038023  | -2.998857 | 4.833013  | H  | 0.459774  | 3.010345  | -1.120254 |
| C  | 0.661903  | -2.892735 | 4.484046  | H  | 0.192360  | 2.305944  | -3.703965 |
| H  | -0.398893 | -3.287577 | 2.566245  | H  | -2.355821 | 2.769007  | -4.427190 |
| H  | 2.020154  | -3.969851 | 1.633163  | H  | -3.657154 | 3.768382  | -2.299809 |
| H  | 3.803737  | -3.646800 | 3.623879  | H  | -1.915713 | 3.923986  | -0.255064 |

**5d<sup>2+</sup>:**

E = -3377.011739129374 au

|    |           |           |           |    |           |           |           |
|----|-----------|-----------|-----------|----|-----------|-----------|-----------|
| C  | -0.064228 | -0.058448 | 0.009946  | H  | 2.466799  | -2.778582 | 5.939653  |
| C  | -0.001033 | 0.062890  | 1.345728  | H  | -0.127480 | -2.615590 | 5.256221  |
| H  | 0.836210  | -0.280155 | -0.552526 | C  | -1.281000 | 0.043733  | -0.774525 |
| H  | -0.901453 | 0.284550  | 1.908248  | C  | -2.562436 | 0.531598  | -0.369960 |
| C  | 1.215815  | -0.039473 | 2.130109  | C  | -3.457774 | 0.411449  | -1.466240 |
| C  | 1.327232  | 0.331477  | 3.503485  | C  | -2.729400 | -0.118872 | -2.570907 |
| C  | 2.664402  | 0.121953  | 3.926518  | C  | -1.392361 | -0.327920 | -2.147676 |
| C  | 3.392513  | -0.407954 | 2.821401  | H  | -2.815786 | 0.926637  | 0.600699  |
| C  | 2.497086  | -0.527231 | 1.725260  | H  | -4.502579 | 0.678113  | -1.461689 |
| H  | 0.522633  | 0.710028  | 4.115042  | H  | -3.122840 | -0.326260 | -3.553202 |
| H  | 3.058110  | 0.329068  | 4.908756  | H  | -0.587562 | -0.706387 | -2.759038 |
| H  | 4.437232  | -0.674950 | 2.816580  | Fe | -1.941083 | 1.738305  | -2.002886 |
| H  | 2.750177  | -0.922164 | 0.754481  | C  | -0.581203 | 3.414597  | -1.973997 |
| Fe | 1.875207  | -1.734045 | 3.359365  | C  | -0.770810 | 2.982453  | -3.309347 |
| C  | 0.538511  | -3.430918 | 3.292187  | C  | -2.155131 | 3.078171  | -3.613192 |
| C  | 1.825205  | -3.784722 | 2.813369  | C  | -2.824706 | 3.571373  | -2.454824 |
| C  | 2.763051  | -3.554062 | 3.860675  | C  | -1.844822 | 3.776256  | -1.440402 |
| C  | 2.044519  | -3.052296 | 4.985849  | H  | 0.358027  | 3.431532  | -1.443585 |
| C  | 0.671160  | -2.976791 | 4.627385  | H  | -0.001836 | 2.618769  | -3.972863 |
| H  | -0.378754 | -3.465634 | 2.725409  | H  | -2.616910 | 2.819809  | -4.552926 |
| H  | 2.055120  | -4.157367 | 1.827811  | H  | -3.881753 | 3.765073  | -2.366020 |
| H  | 3.824917  | -3.735862 | 3.814030  | H  | -2.031903 | 4.140555  | -0.442810 |

**6a:**

E = -94.615320831283 au

|   |           |          |           |   |           |           |           |
|---|-----------|----------|-----------|---|-----------|-----------|-----------|
| C | 0.057983  | 0.585986 | -0.000000 | N | 0.049830  | -0.677392 | -0.000000 |
| H | -0.836099 | 1.218574 | 0.000000  | H | -0.904271 | -1.043364 | 0.000000  |
| H | 1.016057  | 1.107192 | 0.000000  |   |           |           |           |

**6b:**

E = -556.650366235714 au

|   |           |           |           |   |          |           |           |
|---|-----------|-----------|-----------|---|----------|-----------|-----------|
| C | -1.840600 | 0.171045  | -0.084272 | C | 1.825671 | -0.224390 | 0.070446  |
| C | -2.707846 | 1.199241  | -0.460518 | C | 2.365990 | 0.982386  | 0.529865  |
| C | -4.083607 | 1.026816  | -0.384586 | C | 3.735922 | 1.201117  | 0.475336  |
| C | -4.604929 | -0.178345 | 0.069351  | C | 4.584100 | 0.227433  | -0.039392 |
| C | -3.746354 | -1.210007 | 0.447264  | C | 4.052689 | -0.980231 | -0.483163 |
| C | -2.374885 | -1.039288 | 0.372739  | C | 2.687930 | -1.212828 | -0.413872 |
| H | -2.297344 | 2.137913  | -0.814622 | H | 1.713178 | 1.730854  | 0.960586  |
| H | -4.747076 | 1.829990  | -0.678879 | H | 4.143289 | 2.134081  | 0.844931  |
| H | -5.677109 | -0.316507 | 0.130098  | H | 5.651727 | 0.400944  | -0.079488 |
| H | -4.154328 | -2.148414 | 0.801292  | H | 4.707716 | -1.748561 | -0.874616 |
| H | -1.695431 | -1.829462 | 0.662221  | H | 2.263569 | -2.152868 | -0.741460 |
| C | -0.396644 | 0.385214  | -0.175804 | N | 0.456142 | -0.510963 | 0.120054  |
| H | -0.086281 | 1.375300  | -0.533862 |   |          |           |           |

**6c:**

E = -785.686070014948 au

|   |           |           |           |   |           |           |           |
|---|-----------|-----------|-----------|---|-----------|-----------|-----------|
| C | 1.828466  | -0.197452 | -0.130397 | H | -4.141938 | -2.252353 | -0.681953 |
| C | 2.716419  | -1.201989 | 0.251448  | H | -4.767369 | 1.791842  | 0.597376  |
| C | 4.086054  | -0.977087 | 0.305666  | H | -2.343199 | 2.137650  | 0.676960  |
| C | 4.597109  | 0.267357  | -0.059810 | C | -0.406029 | 0.394621  | 0.108873  |
| C | 3.722479  | 1.271274  | -0.481192 | H | -0.114166 | 1.407739  | 0.414974  |
| C | 2.360416  | 1.043264  | -0.514046 | O | -5.930459 | -0.565961 | -0.127917 |
| H | 2.312726  | -2.169000 | 0.521824  | O | 5.920553  | 0.590902  | -0.057912 |
| H | 4.739858  | -1.776734 | 0.621368  | C | -6.876911 | 0.438730  | 0.198393  |
| H | 4.136783  | 2.221517  | -0.792264 | H | -6.787247 | 1.301607  | -0.468089 |
| H | 1.701316  | 1.822877  | -0.873741 | H | -7.855167 | -0.017786 | 0.068105  |
| C | -1.841480 | 0.151303  | 0.046166  | H | -6.765555 | 0.768949  | 1.235369  |
| C | -2.367029 | -1.092213 | -0.339960 | C | 6.852844  | -0.400272 | 0.334327  |
| C | -3.726892 | -1.297682 | -0.386403 | H | 7.833918  | 0.063777  | 0.261728  |
| C | -4.610403 | -0.262784 | -0.049527 | H | 6.681991  | -0.725379 | 1.365380  |
| C | -4.107289 | 0.978981  | 0.333861  | H | 6.814195  | -1.270615 | -0.328197 |
| C | -2.731454 | 1.170849  | 0.377365  | N | 0.462394  | -0.500765 | -0.151947 |
| H | -1.679660 | -1.886065 | -0.599111 |   |           |           |           |

**6d:**

E = -487.075677471275 au

|   |           |           |           |   |           |           |           |
|---|-----------|-----------|-----------|---|-----------|-----------|-----------|
| C | -1.484796 | 0.265914  | -0.017941 | F | 1.460886  | -0.478470 | 1.098645  |
| H | -1.367508 | 1.350008  | -0.011963 | N | -2.759429 | -0.160941 | -0.029948 |
| C | 0.797637  | -0.055939 | 0.001835  | H | -3.523089 | 0.488522  | -0.034457 |
| F | 1.492387  | -0.491751 | -1.069459 | H | -2.953259 | -1.148749 | -0.035944 |
| F | 0.912878  | 1.307741  | -0.004676 | N | -0.502258 | -0.549860 | -0.014393 |

**6e:**

E = -354.484691586804 au

|   |          |           |           |   |           |           |           |
|---|----------|-----------|-----------|---|-----------|-----------|-----------|
| C | 1.185877 | 0.255878  | 0.000009  | N | -1.063366 | -0.015784 | -0.000010 |
| H | 0.999126 | 1.326828  | 0.000026  | O | -1.188416 | 1.203347  | 0.000018  |
| N | 2.460946 | -0.140741 | 0.000004  | O | -1.973665 | -0.812645 | 0.000000  |
| H | 3.208881 | 0.527774  | 0.000041  | N | 0.229715  | -0.612045 | -0.000010 |
| H | 2.681948 | -1.123589 | -0.000000 |   |           |           |           |



**6f:**

E = -474.844005993028 au

|   |           |           |           |   |           |           |           |
|---|-----------|-----------|-----------|---|-----------|-----------|-----------|
| N | 1.823456  | -1.129427 | -0.369802 | C | -0.700195 | 1.686768  | -0.013254 |
| C | 2.834402  | -0.917268 | 0.359158  | C | -1.836402 | 0.992337  | 0.063014  |
| H | 2.820644  | -0.295908 | 1.256332  | H | -0.668818 | 2.769217  | -0.003842 |
| C | 0.614079  | -0.494597 | -0.167962 | H | -2.807561 | 1.465443  | 0.139595  |
| C | -0.548771 | -1.172239 | -0.093190 | O | -2.886700 | -1.109003 | 0.142719  |
| C | 0.611308  | 1.014290  | -0.091683 | O | 1.647598  | 1.647628  | -0.075588 |
| C | -1.836935 | -0.492686 | 0.049061  | H | 3.774264  | -1.396263 | 0.094935  |
| H | -0.568628 | -2.253374 | -0.137947 |   |           |           |           |

**6g:**

E = -1744.108376261847 au

|   |           |           |           |    |           |           |           |
|---|-----------|-----------|-----------|----|-----------|-----------|-----------|
| N | -3.195376 | -1.526585 | -0.118930 | Fe | 0.421608  | 0.183973  | -0.028108 |
| C | -2.465906 | -0.793300 | 0.620428  | C  | 1.313241  | -1.387279 | -1.039425 |
| H | -2.460898 | -1.018573 | 1.690137  | C  | 2.219078  | -0.293583 | -0.938351 |
| C | -1.617669 | 0.332061  | 0.233114  | C  | 2.428286  | -0.022422 | 0.442750  |
| C | -0.935242 | 1.192004  | 1.153130  | C  | 1.651101  | -0.947324 | 1.195111  |
| C | -0.173024 | 2.126785  | 0.407456  | C  | 0.962610  | -1.790778 | 0.278468  |
| C | -0.371145 | 1.852869  | -0.975604 | H  | 0.938843  | -1.818611 | -1.953382 |
| C | -1.255706 | 0.748965  | -1.087750 | H  | 2.652619  | 0.248482  | -1.762943 |
| H | -0.989357 | 1.124111  | 2.227921  | H  | 3.047096  | 0.761817  | 0.847489  |
| H | 0.464024  | 2.894500  | 0.815382  | H  | 1.578850  | -0.987568 | 2.269729  |
| H | 0.093383  | 2.375024  | -1.796191 | H  | 0.267315  | -2.573757 | 0.534826  |
| H | -1.577083 | 0.291829  | -2.009532 | H  | -3.144127 | -1.232216 | -1.096848 |

**6h:**

E = -2089.638766435100 au

|    |           |           |           |   |           |           |           |
|----|-----------|-----------|-----------|---|-----------|-----------|-----------|
| C  | -1.288196 | -1.291238 | 0.537814  | H | -2.542685 | 2.363495  | 1.667483  |
| C  | -2.246579 | -1.147595 | 1.592889  | C | 2.263830  | -0.721293 | -0.216675 |
| C  | -3.519520 | -1.512411 | 1.084492  | C | 2.646727  | 0.459469  | 0.420543  |
| C  | -3.359079 | -1.879237 | -0.283101 | C | 3.981442  | 0.848453  | 0.478651  |
| C  | -1.990084 | -1.739752 | -0.624596 | C | 4.961558  | 0.048474  | -0.103646 |
| H  | -2.032074 | -0.807946 | 2.593675  | C | 4.587722  | -1.127180 | -0.760489 |
| H  | -4.448822 | -1.493594 | 1.630174  | C | 3.259466  | -1.494522 | -0.828247 |
| H  | -4.149405 | -2.181871 | -0.950814 | H | 1.892203  | 1.105227  | 0.851597  |
| H  | -1.538404 | -1.917350 | -1.585609 | H | 4.238270  | 1.777717  | 0.965867  |
| Fe | -2.735183 | 0.080348  | 0.008185  | H | 5.359080  | -1.731070 | -1.220233 |
| C  | -1.797757 | 1.884240  | -0.384150 | H | 2.964307  | -2.397144 | -1.347188 |
| C  | -2.483157 | 1.426707  | -1.542873 | O | 6.293864  | 0.334327  | -0.103085 |
| C  | -3.864179 | 1.308164  | -1.217524 | C | 6.725892  | 1.516318  | 0.545161  |
| C  | -4.030727 | 1.691631  | 0.142645  | H | 6.294048  | 2.408570  | 0.080713  |
| C  | -2.752780 | 2.046706  | 0.658855  | H | 7.807722  | 1.542191  | 0.435233  |
| H  | -0.734724 | 2.043890  | -0.304350 | H | 6.470428  | 1.505648  | 1.609484  |
| H  | -2.030110 | 1.184355  | -2.490138 | C | 0.118795  | -0.954778 | 0.631713  |
| H  | -4.643193 | 0.964492  | -1.878420 | H | 0.441966  | -0.524352 | 1.588247  |
| H  | -4.957936 | 1.689888  | 0.692265  | N | 0.934797  | -1.148805 | -0.326989 |

**6i:**

E = -2124.345338915554 au

|    |           |           |          |   |           |           |           |
|----|-----------|-----------|----------|---|-----------|-----------|-----------|
| Fe | -2.385841 | -0.065005 | 0.042381 | C | -2.833243 | -2.062649 | 0.426699  |
| C  | -1.464353 | -1.802242 | 0.676668 | C | -3.109746 | -1.752343 | -0.936986 |

|   |           |           |           |   |           |           |           |
|---|-----------|-----------|-----------|---|-----------|-----------|-----------|
| C | -1.910789 | -1.297026 | -1.537815 | H | -0.571545 | 2.086830  | 0.027970  |
| C | -0.876819 | -1.332150 | -0.542489 | C | 0.470839  | -0.854919 | -0.728913 |
| H | -0.941285 | -1.916256 | 1.610817  | H | 0.688564  | -0.412706 | -1.704109 |
| H | -3.552603 | -2.408390 | 1.151149  | C | 2.608370  | -0.399928 | 0.065179  |
| H | -4.070549 | -1.826785 | -1.419500 | C | 2.712386  | 1.043437  | -0.370969 |
| H | -1.789409 | -0.970803 | -2.558294 | C | 3.734151  | -1.069535 | 0.404724  |
| C | -2.096613 | 1.378067  | 1.497497  | C | 4.053831  | 1.657184  | -0.402524 |
| C | -3.486249 | 1.106825  | 1.344196  | C | 5.057003  | -0.460221 | 0.345137  |
| C | -3.845616 | 1.402933  | -0.000185 | H | 3.684005  | -2.100515 | 0.729720  |
| C | -2.677985 | 1.856414  | -0.676370 | C | 5.144304  | 0.963261  | -0.074367 |
| C | -1.597869 | 1.842863  | 0.249507  | H | 4.084698  | 2.695868  | -0.707911 |
| H | -1.516462 | 1.229475  | 2.393523  | H | 6.139005  | 1.391389  | -0.093452 |
| H | -4.144967 | 0.720923  | 2.105158  | O | 1.726705  | 1.683982  | -0.687226 |
| H | -4.824050 | 1.280552  | -0.435618 | O | 6.074669  | -1.076455 | 0.628044  |
| H | -2.616336 | 2.138739  | -1.714755 | N | 1.366214  | -0.967900 | 0.178206  |

**6j:**

$E = -3393.590801861973$  au

|    |           |           |           |    |           |           |           |
|----|-----------|-----------|-----------|----|-----------|-----------|-----------|
| N  | 0.392870  | -0.120449 | 0.233135  | H  | -2.991655 | -2.255063 | -1.344622 |
| C  | -0.437233 | 0.186209  | -0.684689 | C  | 1.517970  | -0.879520 | -0.077489 |
| H  | -0.309798 | -0.149446 | -1.720603 | C  | 2.179329  | -1.075518 | -1.336223 |
| C  | -1.616278 | 0.989344  | -0.427063 | C  | 3.306098  | -1.913070 | -1.112684 |
| C  | -2.583198 | 1.377713  | -1.410221 | C  | 3.356057  | -2.233377 | 0.273946  |
| C  | -3.616052 | 2.095295  | -0.754549 | C  | 2.264087  | -1.589638 | 0.913854  |
| C  | -3.299786 | 2.152067  | 0.633296  | H  | 1.900799  | -0.636065 | -2.279631 |
| C  | -2.073874 | 1.469985  | 0.839435  | H  | 4.017862  | -2.226490 | -1.859373 |
| H  | -2.535349 | 1.146847  | -2.462641 | H  | 4.107765  | -2.836363 | 0.756656  |
| H  | -4.498549 | 2.502860  | -1.220248 | H  | 2.021168  | -1.610031 | 1.963330  |
| H  | -3.906246 | 2.607402  | 1.399488  | Fe | 3.464542  | -0.182379 | 0.007898  |
| H  | -1.569201 | 1.309832  | 1.776959  | C  | 3.367939  | 1.810556  | 0.547583  |
| Fe | -3.459841 | 0.172202  | 0.019000  | C  | 4.172589  | 1.092289  | 1.475813  |
| C  | -3.271956 | -1.730426 | 0.807608  | C  | 5.263699  | 0.519615  | 0.763088  |
| C  | -4.320787 | -1.033297 | 1.467957  | C  | 5.133418  | 0.883626  | -0.606654 |
| C  | -5.294538 | -0.674870 | 0.493866  | C  | 3.961682  | 1.682093  | -0.738901 |
| C  | -4.848545 | -1.154082 | -0.769505 | H  | 2.444214  | 2.318767  | 0.771649  |
| C  | -3.599474 | -1.806639 | -0.575540 | H  | 3.973638  | 0.977809  | 2.528873  |
| H  | -2.366771 | -2.096661 | 1.264097  | H  | 6.039097  | -0.100541 | 1.182727  |
| H  | -4.354703 | -0.787798 | 2.516999  | H  | 5.793478  | 0.589062  | -1.406265 |
| H  | -6.198401 | -0.116799 | 0.676866  | H  | 3.576793  | 2.095014  | -1.657210 |
| H  | -5.354882 | -1.021503 | -1.711842 |    |           |           |           |

**6j<sup>+</sup>:**

$E = -3393.372744461351$  au

|   |           |           |           |    |           |           |           |
|---|-----------|-----------|-----------|----|-----------|-----------|-----------|
| N | 0.343146  | -0.108452 | 0.143766  | H  | -1.570991 | 1.499091  | 1.619283  |
| C | -0.542081 | 0.131926  | -0.768368 | Fe | -3.470085 | 0.167261  | 0.014488  |
| H | -0.472391 | -0.332926 | -1.758095 | C  | -3.321813 | -1.674768 | 0.952585  |
| C | -1.668143 | 0.978133  | -0.557407 | C  | -4.307826 | -0.886239 | 1.600008  |
| C | -2.683079 | 1.257689  | -1.543889 | C  | -5.310970 | -0.563817 | 0.644856  |
| C | -3.688106 | 2.028158  | -0.920919 | C  | -4.950281 | -1.165236 | -0.592164 |
| C | -3.331016 | 2.212159  | 0.446505  | C  | -3.721105 | -1.849570 | -0.405629 |
| C | -2.099492 | 1.563131  | 0.683588  | H  | -2.419175 | -2.054391 | 1.403253  |
| H | -2.665114 | 0.941382  | -2.574512 | H  | -4.283026 | -0.557531 | 2.626189  |
| H | -4.589976 | 2.386368  | -1.389529 | H  | -6.182696 | 0.044386  | 0.822634  |
| H | -3.922817 | 2.729473  | 1.183945  | H  | -5.498959 | -1.088056 | -1.516674 |

|    |           |           |           |   |          |           |           |
|----|-----------|-----------|-----------|---|----------|-----------|-----------|
| H  | -3.180764 | -2.396065 | -1.161565 | C | 3.740576 | 1.523548  | 1.223266  |
| C  | 1.428423  | -0.874604 | -0.158128 | C | 4.854410 | 0.667939  | 1.449806  |
| C  | 2.158817  | -0.983304 | -1.391034 | C | 5.554428 | 0.519582  | 0.226599  |
| C  | 3.267147  | -1.850039 | -1.183472 | C | 4.869696 | 1.264990  | -0.765002 |
| C  | 3.274891  | -2.234338 | 0.186891  | C | 3.749092 | 1.894139  | -0.151150 |
| C  | 2.176839  | -1.598313 | 0.825413  | H | 3.011197 | 1.823946  | 1.957922  |
| H  | 1.907628  | -0.489690 | -2.315957 | H | 5.111608 | 0.197192  | 2.385263  |
| H  | 3.983521  | -2.149224 | -1.931846 | H | 6.426443 | -0.094666 | 0.067222  |
| H  | 3.994698  | -2.881845 | 0.661041  | H | 5.143291 | 1.332039  | -1.805854 |
| H  | 1.908910  | -1.659823 | 1.867745  | H | 3.032921 | 2.533731  | -0.641159 |
| Fe | 3.510803  | -0.179000 | 0.019338  |   |          |           |           |

**6j<sup>2+</sup>:**

E = -3393.049460164889 au

|    |           |           |           |    |           |           |           |
|----|-----------|-----------|-----------|----|-----------|-----------|-----------|
| N  | 0.384217  | -0.084162 | 0.060947  | H  | -4.527219 | -2.050689 | -1.652235 |
| C  | -0.501315 | -0.010576 | -0.853955 | C  | 1.523112  | -0.847503 | -0.146196 |
| H  | -0.414954 | -0.553074 | -1.800935 | C  | 2.289854  | -1.019605 | -1.338923 |
| C  | -1.687587 | 0.819784  | -0.693103 | C  | 3.383176  | -1.877852 | -1.038498 |
| C  | -2.639234 | 1.117918  | -1.722940 | C  | 3.315179  | -2.213211 | 0.344026  |
| C  | -3.590503 | 2.019336  | -1.194598 | C  | 2.190552  | -1.548819 | 0.902026  |
| C  | -3.256465 | 2.276810  | 0.159878  | H  | 2.088233  | -0.561794 | -2.294574 |
| C  | -2.091585 | 1.537695  | 0.481888  | H  | 4.135037  | -2.208385 | -1.737555 |
| H  | -2.630326 | 0.725229  | -2.728191 | H  | 4.001888  | -2.850708 | 0.877660  |
| H  | -4.448053 | 2.411559  | -1.719207 | H  | 1.867794  | -1.575631 | 1.930502  |
| H  | -3.815529 | 2.903519  | 0.837328  | Fe | 3.585147  | -0.151394 | 0.120458  |
| H  | -1.581519 | 1.520241  | 1.430898  | C  | 3.846409  | 1.540809  | 1.320914  |
| Fe | -3.579276 | 0.161350  | -0.070969 | C  | 4.936817  | 0.654860  | 1.549011  |
| C  | -3.548304 | -1.879990 | 0.352865  | C  | 5.636415  | 0.493569  | 0.325268  |
| C  | -3.933481 | -1.152127 | 1.517727  | C  | 4.980924  | 1.267947  | -0.663462 |
| C  | -5.153561 | -0.481772 | 1.226538  | C  | 3.873543  | 1.919291  | -0.052781 |
| C  | -5.521685 | -0.793538 | -0.106163 | H  | 3.130657  | 1.867341  | 2.058030  |
| C  | -4.533963 | -1.651649 | -0.650042 | H  | 5.182217  | 0.175832  | 2.483843  |
| H  | -2.673949 | -2.502881 | 0.252965  | H  | 6.492714  | -0.143121 | 0.165203  |
| H  | -3.401225 | -1.118775 | 2.454837  | H  | 5.261628  | 1.331775  | -1.703141 |
| H  | -5.693541 | 0.171556  | 1.894130  | H  | 3.182163  | 2.585351  | -0.543633 |
| H  | -6.382965 | -0.408322 | -0.630040 |    |           |           |           |

**6k:**

E = -487.023659265218 au

|   |           |           |           |   |           |           |           |
|---|-----------|-----------|-----------|---|-----------|-----------|-----------|
| C | 0.844270  | -0.008921 | -0.001078 | H | -3.455327 | 0.592512  | -0.270920 |
| F | 1.519995  | -0.526061 | -1.057323 | H | -2.984904 | -1.047995 | -0.222140 |
| F | 0.956772  | 1.318947  | -0.055910 | C | -0.571709 | -0.491921 | 0.001820  |
| F | 1.498222  | -0.434535 | 1.107717  | H | -0.697079 | -1.576387 | 0.025640  |
| N | -2.792389 | -0.090571 | 0.055577  | N | -1.524850 | 0.344969  | -0.010024 |

**6l:**

E = -354.455129227325 au

|   |          |           |           |   |           |           |           |
|---|----------|-----------|-----------|---|-----------|-----------|-----------|
| N | 2.479682 | -0.081618 | -0.026576 | N | -1.096630 | 0.021765  | -0.002261 |
| H | 3.162205 | 0.618938  | 0.205163  | O | -1.297500 | 1.219990  | -0.000075 |
| H | 2.707815 | -1.047037 | 0.180875  | O | -1.961602 | -0.850571 | -0.004885 |
| C | 0.269172 | -0.490312 | 0.001764  | N | 1.225800  | 0.338587  | 0.012287  |
| H | 0.312497 | -1.574609 | -0.009739 |   |           |           |           |

**6m:**

E = -474.851905455299 au

|   |           |           |           |   |           |           |           |
|---|-----------|-----------|-----------|---|-----------|-----------|-----------|
| C | -0.748504 | -0.124962 | 0.000018  | H | 3.091123  | 0.843107  | -0.000020 |
| C | 0.186397  | -1.088667 | 0.000020  | O | 2.465267  | -1.669846 | 0.000044  |
| C | -0.338602 | 1.309625  | 0.000051  | O | -1.162933 | 2.206893  | -0.000040 |
| C | 1.629940  | -0.782843 | -0.000008 | C | -2.197278 | -0.418523 | 0.000010  |
| H | -0.094473 | -2.134755 | 0.000026  | H | -2.843998 | 0.460029  | 0.000043  |
| C | 1.109075  | 1.613362  | -0.000007 | N | -2.618022 | -1.616051 | -0.000028 |
| C | 2.026608  | 0.643851  | -0.000006 | H | -3.636515 | -1.649107 | -0.000024 |
| H | 1.366082  | 2.665445  | -0.000027 |   |           |           |           |

**6n:**

E = -1744.095104378719 au

|    |           |           |           |   |           |           |           |
|----|-----------|-----------|-----------|---|-----------|-----------|-----------|
| C  | -1.620753 | 0.230459  | -0.211578 | C | 2.436597  | 0.014405  | -0.493664 |
| C  | -1.238330 | 0.768395  | 1.062130  | C | 2.255396  | -0.190580 | 0.902895  |
| C  | -0.399595 | 1.890229  | 0.824746  | C | 1.383823  | -1.303592 | 1.073570  |
| C  | -0.256759 | 2.052492  | -0.583096 | H | 0.343648  | -2.592423 | -0.426155 |
| C  | -0.998384 | 1.025672  | -1.223079 | H | 1.585771  | -1.066121 | -2.254880 |
| H  | -1.502114 | 0.371660  | 2.028432  | H | 3.025908  | 0.794241  | -0.948015 |
| H  | 0.073040  | 2.496205  | 1.580874  | H | 2.684368  | 0.405535  | 1.691844  |
| H  | 0.335640  | 2.806507  | -1.075130 | H | 1.035689  | -1.696688 | 2.014926  |
| H  | -1.089169 | 0.850176  | -2.282110 | C | -3.247204 | -1.314153 | 0.334300  |
| Fe | 0.429662  | 0.183421  | -0.004126 | H | -3.844940 | -2.187235 | 0.084488  |
| C  | 1.026040  | -1.784854 | -0.216582 | H | -3.414136 | -0.856231 | 1.314682  |
| C  | 1.676804  | -0.970844 | -1.185251 | N | -2.413120 | -0.880767 | -0.515020 |

**6o:**

E = -2089.638690930540 au

|    |          |           |           |   |           |           |           |
|----|----------|-----------|-----------|---|-----------|-----------|-----------|
| C  | 1.222645 | -1.134659 | -0.557374 | H | 2.780148  | 2.437248  | -1.502872 |
| C  | 2.159310 | -0.985895 | -1.627487 | C | -0.973588 | -1.138959 | 0.162889  |
| C  | 3.412198 | -1.496258 | -1.197626 | H | -0.727296 | -1.880367 | 0.932857  |
| C  | 3.267588 | -1.947783 | 0.145119  | C | -2.363024 | -0.699415 | 0.140848  |
| C  | 1.923257 | -1.723859 | 0.548348  | C | -2.825477 | 0.243874  | -0.779782 |
| H  | 1.927841 | -0.551271 | -2.585747 | C | -4.148781 | 0.652194  | -0.785347 |
| H  | 4.321639 | -1.514638 | -1.775797 | C | -5.044445 | 0.116239  | 0.145451  |
| H  | 4.050518 | -2.360887 | 0.760569  | C | -4.596773 | -0.827833 | 1.072169  |
| H  | 1.519390 | -1.927941 | 1.526031  | C | -3.274521 | -1.225995 | 1.064414  |
| Fe | 2.806809 | 0.064602  | 0.022740  | H | -2.125555 | 0.652688  | -1.496153 |
| C  | 2.018197 | 1.907572  | 0.527996  | H | -4.475158 | 1.382736  | -1.510818 |
| C  | 2.677092 | 1.334942  | 1.651383  | H | -5.303933 | -1.232021 | 1.784198  |
| C  | 4.042429 | 1.127844  | 1.303855  | H | -2.935035 | -1.959829 | 1.786497  |
| C  | 4.226692 | 1.574124  | -0.034949 | O | -6.357375 | 0.450613  | 0.224862  |
| C  | 2.975644 | 2.055133  | -0.514228 | C | -6.873412 | 1.400804  | -0.693273 |
| H  | 0.968288 | 2.141971  | 0.460303  | H | -6.374904 | 2.368767  | -0.587670 |
| H  | 2.217159 | 1.078398  | 2.591904  | H | -7.927596 | 1.509711  | -0.449811 |
| H  | 4.798164 | 0.690178  | 1.935673  | H | -6.773642 | 1.052626  | -1.725457 |
| H  | 5.146487 | 1.532766  | -0.595477 | N | -0.096060 | -0.703129 | -0.653293 |

**6p:**

E = -2124.330156128223 au

|   |          |           |           |   |          |           |           |
|---|----------|-----------|-----------|---|----------|-----------|-----------|
| C | 1.273376 | -1.270941 | -0.472854 | C | 2.192329 | -1.167538 | -1.568628 |
|---|----------|-----------|-----------|---|----------|-----------|-----------|

|    |          |           |           |   |           |           |           |
|----|----------|-----------|-----------|---|-----------|-----------|-----------|
| C  | 3.463909 | -1.599666 | -1.117232 | H | 5.099230  | 1.532383  | -0.662412 |
| C  | 3.352291 | -1.952982 | 0.258661  | H | 2.743771  | 2.248082  | -1.753475 |
| C  | 2.007686 | -1.754629 | 0.665494  | C | -0.899987 | -1.180696 | 0.306624  |
| H  | 1.933281 | -0.812065 | -2.551899 | H | -0.675608 | -1.894663 | 1.107685  |
| H  | 4.367878 | -1.627674 | -1.703360 | C | -2.274358 | -0.698174 | 0.264836  |
| H  | 4.159559 | -2.286512 | 0.890544  | C | -2.606797 | 0.615247  | -0.386087 |
| H  | 1.623651 | -1.899062 | 1.661573  | C | -4.041278 | 0.917028  | -0.602912 |
| Fe | 2.790348 | 0.029714  | -0.011733 | C | -5.005582 | 0.181597  | -0.045827 |
| C  | 1.907803 | 1.879071  | 0.281449  | C | -4.680069 | -1.010589 | 0.767991  |
| C  | 2.534124 | 1.439822  | 1.480981  | C | -3.264766 | -1.396752 | 0.857020  |
| C  | 3.922038 | 1.258843  | 1.215776  | H | -4.244544 | 1.813751  | -1.175318 |
| C  | 4.152813 | 1.586768  | -0.149307 | H | -3.061752 | -2.314102 | 1.398447  |
| C  | 2.908127 | 1.969024  | -0.725574 | N | -0.036032 | -0.832477 | -0.563674 |
| H  | 0.851996 | 2.046215  | 0.137147  | H | -6.057234 | 0.422376  | -0.141416 |
| H  | 2.039916 | 1.252145  | 2.420425  | O | -1.763986 | 1.446690  | -0.652800 |
| H  | 4.662782 | 0.914029  | 1.918819  | O | -5.555647 | -1.659387 | 1.317943  |

**6a·H<sup>+</sup>:**

E = -94.958452641655 au

|   |           |           |           |   |           |           |           |
|---|-----------|-----------|-----------|---|-----------|-----------|-----------|
| N | 0.599016  | 0.000003  | -0.000002 | H | -1.210948 | -0.941922 | 0.000005  |
| C | -0.672621 | -0.000000 | 0.000002  | H | 1.136271  | 0.865415  | -0.000005 |
| H | -1.210952 | 0.941918  | 0.000003  | H | 1.136275  | -0.865406 | -0.000003 |

**6b·H<sup>+</sup>:**

E = -557.029426224857 au

|   |           |           |           |   |          |           |           |
|---|-----------|-----------|-----------|---|----------|-----------|-----------|
| C | -1.877097 | 0.192944  | -0.022089 | C | 1.880751 | -0.167370 | 0.034454  |
| C | -2.755265 | 1.263236  | -0.274021 | C | 2.413742 | 1.086651  | 0.322250  |
| C | -4.123565 | 1.061680  | -0.260250 | C | 3.788608 | 1.254445  | 0.281194  |
| C | -4.629818 | -0.205083 | 0.010550  | C | 4.621651 | 0.183084  | -0.030518 |
| C | -3.769387 | -1.275301 | 0.271739  | C | 4.078725 | -1.068651 | -0.296452 |
| C | -2.404603 | -1.083104 | 0.257999  | C | 2.704718 | -1.249981 | -0.262637 |
| H | -2.353077 | 2.246448  | -0.484319 | H | 1.780615 | 1.916201  | 0.606249  |
| H | -4.794961 | 1.886075  | -0.457390 | H | 4.212854 | 2.222600  | 0.510102  |
| H | -5.700085 | -0.364881 | 0.024915  | H | 5.693904 | 0.323126  | -0.053493 |
| H | -4.175509 | -2.253472 | 0.490241  | H | 4.723132 | -1.904689 | -0.531411 |
| H | -1.757981 | -1.923242 | 0.480921  | H | 2.276161 | -2.221341 | -0.480135 |
| C | -0.479223 | 0.473453  | -0.073646 | N | 0.478859 | -0.400672 | 0.039415  |
| H | -0.170043 | 1.499142  | -0.232392 | H | 0.216503 | -1.376619 | 0.125721  |

**6c·H<sup>+</sup>:**

E = -786.080780768789 au

|   |           |           |           |   |           |           |           |
|---|-----------|-----------|-----------|---|-----------|-----------|-----------|
| C | 1.880865  | -0.123777 | -0.058076 | C | -2.390942 | -1.122733 | -0.222568 |
| C | 2.736984  | -1.196382 | 0.166954  | C | -3.738971 | -1.345088 | -0.235895 |
| C | 4.109439  | -1.011605 | 0.184663  | C | -4.639903 | -0.277634 | -0.024458 |
| C | 4.637692  | 0.265610  | -0.027029 | C | -4.147804 | 1.018012  | 0.194984  |
| C | 3.767047  | 1.341096  | -0.268472 | C | -2.787094 | 1.229566  | 0.205523  |
| C | 2.404714  | 1.151326  | -0.289666 | H | -1.732163 | -1.963679 | -0.402734 |
| H | 2.333363  | -2.186922 | 0.343216  | H | -4.147283 | -2.330619 | -0.412244 |
| H | 4.753740  | -1.858372 | 0.364360  | H | -4.820003 | 1.847086  | 0.354011  |
| H | 4.193823  | 2.317050  | -0.454151 | H | -2.409966 | 2.230413  | 0.376385  |
| H | 1.761517  | 1.991853  | -0.511558 | C | -0.492816 | 0.481979  | 0.049839  |
| C | -1.874456 | 0.175687  | 0.005021  | H | -0.204652 | 1.516329  | 0.185689  |

|   |           |           |           |   |          |           |           |
|---|-----------|-----------|-----------|---|----------|-----------|-----------|
| O | -5.926195 | -0.602045 | -0.057361 | C | 6.898676 | -0.477228 | 0.190613  |
| O | 5.943247  | 0.561564  | -0.031735 | H | 7.871021 | 0.003280  | 0.138806  |
| C | -6.927455 | 0.406322  | 0.140625  | H | 6.763390 | -0.926094 | 1.177176  |
| H | -6.861431 | 1.170268  | -0.635680 | H | 6.826805 | -1.244313 | -0.583660 |
| H | -7.878002 | -0.112370 | 0.067276  | N | 0.489650 | -0.377642 | -0.047961 |
| H | -6.827130 | 0.857950  | 1.128875  | H | 0.245254 | -1.358223 | -0.117292 |

**6d·H<sup>+</sup>:**

E = -487.419183035902 au

|   |           |           |           |   |          |           |           |
|---|-----------|-----------|-----------|---|----------|-----------|-----------|
| C | 1.541933  | 0.283805  | -0.000003 | N | 2.777437 | -0.135304 | 0.000003  |
| H | 1.367472  | 1.353101  | -0.000017 | H | 3.534247 | 0.534562  | -0.000005 |
| C | -0.894773 | -0.010073 | 0.000005  | H | 3.034193 | -1.114402 | 0.000017  |
| F | -1.508752 | -0.462988 | 1.079298  | N | 0.486070 | -0.499752 | 0.000007  |
| F | -0.886513 | 1.315394  | -0.000017 | H | 0.574145 | -1.511062 | 0.000025  |
| F | -1.508762 | -0.463024 | -1.079268 |   |          |           |           |

**6e·H<sup>+</sup>:**

E = -354.819087784063 au

|   |          |           |           |   |           |           |           |
|---|----------|-----------|-----------|---|-----------|-----------|-----------|
| C | 1.547446 | 0.253278  | 0.000000  | N | 0.513290  | -0.553882 | 0.000020  |
| H | 1.313582 | 1.314281  | -0.000019 | H | 0.519840  | -1.569491 | 0.000036  |
| N | 2.795630 | -0.120745 | 0.000004  | N | -0.892193 | 0.014015  | 0.000009  |
| H | 3.527344 | 0.577582  | -0.000011 | O | -1.715552 | -0.840980 | 0.000009  |
| H | 3.087133 | -1.090295 | 0.000022  | O | -0.948144 | 1.203204  | -0.000019 |

**6f·H<sup>+</sup>:**

E = -475.184662485103 au

|   |           |           |           |   |           |           |           |
|---|-----------|-----------|-----------|---|-----------|-----------|-----------|
| N | 1.793125  | -1.169690 | 0.000000  | C | -0.768931 | 1.689839  | 0.000002  |
| C | 2.999325  | -0.725728 | 0.000004  | C | -1.909825 | 0.992447  | 0.000002  |
| H | 3.171268  | 0.342086  | 0.000005  | H | -0.745136 | 2.772382  | 0.000009  |
| C | 0.559051  | -0.458010 | -0.000004 | H | -2.882877 | 1.467268  | 0.000010  |
| C | -0.577140 | -1.165039 | -0.000003 | O | -2.914128 | -1.150432 | -0.000001 |
| C | 0.551426  | 1.041186  | -0.000011 | O | 1.588918  | 1.673252  | -0.000002 |
| C | -1.905028 | -0.483234 | -0.000011 | H | 3.804684  | -1.450029 | 0.000006  |
| H | -0.607410 | -2.250124 | 0.000001  | H | 1.672323  | -2.182002 | -0.000001 |

**6g·H<sup>+</sup>:**

E = -1744.499521626297 au

|    |           |           |           |   |           |           |           |
|----|-----------|-----------|-----------|---|-----------|-----------|-----------|
| N  | 3.079584  | -1.401560 | 0.183106  | C | -1.271353 | -1.450119 | 1.021620  |
| C  | 2.369599  | -0.636082 | -0.614225 | C | -2.164711 | -0.344261 | 0.965877  |
| H  | 2.404582  | -0.892417 | -1.667199 | C | -2.414228 | -0.046691 | -0.401484 |
| C  | 1.615912  | 0.476318  | -0.225176 | C | -1.675010 | -0.964915 | -1.196205 |
| C  | 0.852902  | 1.286819  | -1.158347 | C | -0.976605 | -1.834811 | -0.314379 |
| C  | 0.054442  | 2.161475  | -0.402835 | H | -0.891543 | -1.914140 | 1.917035  |
| C  | 0.263691  | 1.894029  | 0.982116  | H | -2.568018 | 0.187757  | 1.812012  |
| C  | 1.205157  | 0.854906  | 1.110925  | H | -3.036107 | 0.752461  | -0.770719 |
| H  | 0.924492  | 1.243550  | -2.233009 | H | -1.649804 | -0.995525 | -2.273107 |
| H  | -0.630310 | 2.890920  | -0.803003 | H | -0.321169 | -2.638908 | -0.609594 |
| H  | -0.240119 | 2.386400  | 1.797635  | H | 3.150399  | -1.218550 | 1.173222  |
| H  | 1.554652  | 0.437933  | 2.041459  | H | 3.592375  | -2.192563 | -0.174336 |
| Fe | -0.392291 | 0.143658  | 0.012680  |   |           |           |           |

**6h·H<sup>+</sup>:**

E = -2090.034741270726 au

|    |          |           |           |   |           |           |           |
|----|----------|-----------|-----------|---|-----------|-----------|-----------|
| C  | 1.321487 | -1.320716 | -0.597425 | C | -2.300459 | -0.702831 | 0.146654  |
| C  | 2.317208 | -1.122385 | -1.628736 | C | -2.695191 | 0.402939  | -0.596582 |
| C  | 3.566897 | -1.485537 | -1.090895 | C | -4.023393 | 0.799310  | -0.601336 |
| C  | 3.382738 | -1.876016 | 0.266426  | C | -4.967576 | 0.095164  | 0.154799  |
| C  | 2.013411 | -1.766431 | 0.590108  | C | -4.555210 | -1.005249 | 0.919760  |
| H  | 2.121843 | -0.787021 | -2.634282 | C | -3.236421 | -1.399348 | 0.915099  |
| H  | 4.510622 | -1.442633 | -1.609032 | H | -1.975100 | 0.982451  | -1.158883 |
| H  | 4.164636 | -2.174413 | 0.945166  | H | -4.310457 | 1.664813  | -1.178564 |
| H  | 1.580053 | -1.983271 | 1.553206  | H | -5.293512 | -1.535701 | 1.504947  |
| Fe | 2.691824 | 0.085503  | -0.005744 | H | -2.931667 | -2.261061 | 1.497375  |
| C  | 1.814847 | 1.929308  | 0.416787  | O | -6.270883 | 0.399989  | 0.222668  |
| C  | 2.472231 | 1.424226  | 1.570797  | C | -6.772809 | 1.505225  | -0.529339 |
| C  | 3.848584 | 1.260194  | 1.249726  | H | -6.305978 | 2.439571  | -0.209023 |
| C  | 4.036988 | 1.660197  | -0.101118 | H | -7.838076 | 1.541264  | -0.321755 |
| C  | 2.778441 | 2.069390  | -0.620612 | H | -6.613108 | 1.354092  | -1.599385 |
| H  | 0.762593 | 2.151803  | 0.337696  | C | -0.025167 | -0.927998 | -0.728637 |
| H  | 2.011875 | 1.202843  | 2.519710  | H | -0.332423 | -0.410941 | -1.628689 |
| H  | 4.611930 | 0.880694  | 1.909075  | N | -0.958941 | -1.157417 | 0.159982  |
| H  | 4.967491 | 1.633129  | -0.644249 | H | -0.705101 | -1.723224 | 0.961196  |
| H  | 2.589896 | 2.421259  | -1.621593 |   |           |           |           |

**6i·H<sup>+</sup>:**

E = -2124.722878159823 au

|    |           |           |           |   |           |           |           |
|----|-----------|-----------|-----------|---|-----------|-----------|-----------|
| Fe | -2.291138 | -0.031391 | 0.085849  | H | -2.580953 | 2.361595  | -1.422190 |
| C  | -1.556335 | -1.913455 | 0.509987  | H | -0.448902 | 2.127842  | 0.184842  |
| C  | -2.943257 | -2.026736 | 0.295400  | C | 0.297538  | -0.815750 | -0.863010 |
| C  | -3.249690 | -1.555666 | -1.014695 | H | 0.495673  | -0.189881 | -1.718956 |
| C  | -2.061604 | -1.130739 | -1.632870 | C | 2.579428  | -0.422443 | -0.062680 |
| C  | -0.972900 | -1.376123 | -0.703507 | C | 2.695887  | 0.967219  | -0.618033 |
| H  | -1.040468 | -2.181638 | 1.417792  | C | 3.643312  | -1.038202 | 0.471257  |
| H  | -3.661167 | -2.381270 | 1.016678  | C | 4.036302  | 1.570934  | -0.636549 |
| H  | -4.236123 | -1.500342 | -1.444790 | C | 4.976415  | -0.397644 | 0.488215  |
| H  | -1.958654 | -0.723271 | -2.625273 | H | 3.589513  | -2.029838 | 0.905991  |
| C  | -1.889653 | 1.264445  | 1.661152  | C | 5.098262  | 0.946729  | -0.119869 |
| C  | -3.288782 | 1.026503  | 1.560800  | H | 4.092681  | 2.557705  | -1.078298 |
| C  | -3.718039 | 1.459599  | 0.276623  | H | 6.088017  | 1.385531  | -0.112864 |
| C  | -2.586277 | 1.967493  | -0.419251 | O | 1.711715  | 1.569846  | -1.005892 |
| C  | -1.460263 | 1.853702  | 0.439442  | O | 5.928786  | -0.967867 | 0.977872  |
| H  | -1.269431 | 1.043026  | 2.514265  | N | 1.309264  | -1.025673 | -0.030353 |
| H  | -3.911398 | 0.576566  | 2.316829  | H | 1.171386  | -1.707607 | 0.704991  |
| H  | -4.721940 | 1.392084  | -0.109754 |   |           |           |           |

**6j·H<sup>+</sup>:**

E = -3393.986601912731 au

|   |           |           |           |    |           |           |           |
|---|-----------|-----------|-----------|----|-----------|-----------|-----------|
| N | 0.386126  | -0.014241 | 0.236630  | C  | -2.184571 | 1.512498  | 0.921996  |
| C | -0.528305 | 0.317027  | -0.637336 | H  | -2.551668 | 1.304366  | -2.421492 |
| H | -0.381046 | -0.051848 | -1.644382 | H  | -4.597366 | 2.502571  | -1.169375 |
| C | -1.660402 | 1.111764  | -0.362542 | H  | -4.076984 | 2.537707  | 1.459389  |
| C | -2.641963 | 1.475344  | -1.361039 | H  | -1.720696 | 1.375706  | 1.885753  |
| C | -3.706581 | 2.118399  | -0.700534 | Fe | -3.439938 | 0.158865  | 0.003961  |
| C | -3.429566 | 2.137984  | 0.696370  | C  | -3.660645 | -1.511327 | 1.220718  |

|   |           |           |           |    |          |           |           |
|---|-----------|-----------|-----------|----|----------|-----------|-----------|
| C | -4.897494 | -0.817984 | 1.104603  | H  | 3.887331 | -2.358376 | -1.753387 |
| C | -5.260975 | -0.792555 | -0.269137 | H  | 4.018699 | -2.826506 | 0.887788  |
| C | -4.250333 | -1.468623 | -1.006130 | H  | 2.020067 | -1.479982 | 2.082071  |
| C | -3.266167 | -1.917153 | -0.083440 | Fe | 3.465678 | -0.178257 | 0.015696  |
| H | -3.121857 | -1.697542 | 2.135378  | C  | 3.566106 | 1.865827  | 0.367991  |
| H | -5.452591 | -0.372351 | 1.913846  | C  | 4.284644 | 1.160962  | 1.374094  |
| H | -6.138015 | -0.321642 | -0.682220 | C  | 5.316887 | 0.419963  | 0.736754  |
| H | -4.232233 | -1.611069 | -2.074199 | C  | 5.235304 | 0.664058  | -0.661262 |
| H | -2.366251 | -2.457120 | -0.332076 | C  | 4.153237 | 1.558241  | -0.889859 |
| C | 1.523125  | -0.809211 | 0.000923  | H  | 2.723409 | 2.519422  | 0.529327  |
| C | 2.126007  | -1.090655 | -1.261043 | H  | 4.080755 | 1.178863  | 2.432389  |
| C | 3.213238  | -1.969969 | -1.008271 | H  | 6.024174 | -0.229733 | 1.225760  |
| C | 3.284237  | -2.216085 | 0.389433  | H  | 5.871008 | 0.232807  | -1.417139 |
| C | 2.241674  | -1.495570 | 1.026924  | H  | 3.830683 | 1.929109  | -1.849114 |
| H | 1.832444  | -0.704951 | -2.223128 | H  | 0.280608 | 0.323643  | 1.185503  |

**6k·H<sup>+</sup>:**

E = -487.344947432406 au

|   |           |           |           |   |           |           |           |
|---|-----------|-----------|-----------|---|-----------|-----------|-----------|
| C | 0.890977  | -0.005594 | -0.000632 | H | -3.074665 | -0.997584 | -0.126140 |
| F | 1.545028  | -0.453921 | -1.064025 | C | -0.523896 | -0.561710 | -0.012836 |
| F | 0.850984  | 1.336252  | -0.035533 | H | -0.675366 | -1.634236 | 0.009679  |
| F | 1.507317  | -0.398764 | 1.105870  | N | -1.512211 | 0.249372  | -0.035374 |
| N | -2.826144 | -0.034111 | 0.061617  | H | -1.298119 | 1.250745  | -0.036488 |
| H | -3.426889 | 0.666897  | -0.353538 |   |           |           |           |

**6l·H<sup>+</sup>:**

E = -354.764035152934 au

|   |          |           |           |   |           |           |           |
|---|----------|-----------|-----------|---|-----------|-----------|-----------|
| N | 2.514488 | -0.021788 | -0.034069 | N | -1.097598 | 0.047213  | -0.002428 |
| H | 3.108184 | 0.745857  | 0.249885  | O | -1.088378 | 1.267569  | 0.003565  |
| H | 2.830248 | -0.967750 | 0.136197  | O | -2.037908 | -0.705072 | -0.015593 |
| C | 0.226919 | -0.605902 | 0.012033  | N | 1.208490  | 0.211796  | 0.029115  |
| H | 0.278260 | -1.685387 | 0.000532  | H | 0.898685  | 1.202735  | 0.022585  |

**6m·H<sup>+</sup>:**

E = -475.201553264335 au

|   |           |           |           |   |           |           |           |
|---|-----------|-----------|-----------|---|-----------|-----------|-----------|
| C | -0.701285 | -0.093718 | -0.000022 | H | 3.160759  | 0.775207  | 0.000055  |
| C | 0.202431  | -1.092484 | -0.000020 | O | 2.444009  | -1.744523 | 0.000016  |
| C | -0.247647 | 1.346287  | -0.000042 | O | -1.075085 | 2.232122  | -0.000004 |
| C | 1.670271  | -0.812645 | -0.000027 | C | -2.131346 | -0.267721 | -0.000021 |
| H | -0.049052 | -2.148763 | -0.000021 | H | -2.722359 | 0.644872  | -0.000052 |
| C | 1.200239  | 1.598316  | 0.000015  | N | -2.769549 | -1.389079 | 0.000015  |
| C | 2.092184  | 0.599152  | 0.000020  | H | -3.783123 | -1.407941 | 0.000010  |
| H | 1.494337  | 2.640444  | 0.000046  | H | -2.303994 | -2.290183 | 0.000049  |

**6n·H<sup>+</sup>:**

E = -1744.464921286670 au

|   |           |          |           |   |           |          |           |
|---|-----------|----------|-----------|---|-----------|----------|-----------|
| C | -1.586190 | 0.338026 | -0.199796 | C | -0.910826 | 1.169069 | -1.157536 |
| C | -1.217094 | 0.741873 | 1.122203  | H | -1.538090 | 0.305877 | 2.053344  |
| C | -0.340681 | 1.844670 | 0.971797  | H | 0.133288  | 2.376703 | 1.779849  |
| C | -0.159038 | 2.107314 | -0.414453 | H | 0.471203  | 2.874184 | -0.833059 |



|    |           |           |           |   |           |           |           |
|----|-----------|-----------|-----------|---|-----------|-----------|-----------|
| H  | -0.999613 | 1.113830  | -2.230827 | H | 3.039405  | 0.852554  | -0.804817 |
| Fe | 0.428520  | 0.148322  | 0.023418  | H | 2.629506  | 0.304880  | 1.792485  |
| C  | 1.083975  | -1.804869 | -0.284603 | H | 1.036165  | -1.855798 | 1.948198  |
| C  | 1.738872  | -0.920839 | -1.186629 | C | -3.288697 | -1.335835 | 0.184016  |
| C  | 2.453589  | 0.035903  | -0.415533 | H | -3.874961 | -2.132545 | -0.249578 |
| C  | 2.235460  | -0.252913 | 0.958743  | H | -3.392129 | -1.068932 | 1.225614  |
| C  | 1.387396  | -1.392098 | 1.040891  | N | -2.451479 | -0.699038 | -0.557777 |
| H  | 0.460902  | -2.641806 | -0.558660 | H | -2.402977 | -0.964665 | -1.538867 |
| H  | 1.700905  | -0.965928 | -2.262804 |   |           |           |           |

**6o·H<sup>+</sup>:**

E = -2090.031635390844 au

|    |          |           |           |   |           |           |           |
|----|----------|-----------|-----------|---|-----------|-----------|-----------|
| C  | 1.246444 | -1.117241 | -0.537079 | C | -1.069792 | -1.097974 | 0.177586  |
| C  | 2.172029 | -0.998414 | -1.619550 | H | -0.797537 | -1.831465 | 0.926413  |
| C  | 3.404640 | -1.534580 | -1.168069 | C | -2.412742 | -0.647237 | 0.135930  |
| C  | 3.243752 | -1.966666 | 0.176199  | C | -2.886194 | 0.335557  | -0.756109 |
| C  | 1.908186 | -1.704918 | 0.582516  | C | -4.205921 | 0.718840  | -0.757932 |
| H  | 1.962743 | -0.597928 | -2.598507 | C | -5.107527 | 0.124464  | 0.147816  |
| H  | 4.314568 | -1.581629 | -1.742663 | C | -4.649447 | -0.852855 | 1.048923  |
| H  | 4.012138 | -2.394233 | 0.798432  | C | -3.331722 | -1.226785 | 1.040805  |
| H  | 1.490409 | -1.904091 | 1.555166  | H | -2.217853 | 0.819048  | -1.458734 |
| Fe | 2.814745 | 0.063111  | 0.028217  | H | -4.541153 | 1.475272  | -1.450873 |
| C  | 2.151403 | 1.956009  | 0.567683  | H | -5.358296 | -1.293098 | 1.736385  |
| C  | 2.809905 | 1.338602  | 1.666228  | H | -2.986977 | -1.982431 | 1.735782  |
| C  | 4.146490 | 1.054267  | 1.271494  | O | -6.398361 | 0.425671  | 0.224592  |
| C  | 4.313074 | 1.495610  | -0.069414 | C | -6.966659 | 1.404909  | -0.655427 |
| C  | 3.079853 | 2.051417  | -0.506806 | H | -6.501888 | 2.379729  | -0.498517 |
| H  | 1.126387 | 2.291403  | 0.553228  | H | -8.018569 | 1.453236  | -0.392286 |
| H  | 2.372845 | 1.116312  | 2.626017  | H | -6.860535 | 1.094981  | -1.696358 |
| H  | 4.896439 | 0.571889  | 1.876690  | N | -0.099035 | -0.718087 | -0.611574 |
| H  | 5.210912 | 1.405137  | -0.658574 | H | -0.309819 | -0.062591 | -1.354085 |
| H  | 2.884730 | 2.466480  | -1.482243 |   |           |           |           |

**6p·H<sup>+</sup>:**

E = -2124.717282598755 au

|    |          |           |           |   |           |           |           |
|----|----------|-----------|-----------|---|-----------|-----------|-----------|
| C  | 1.279984 | -1.184215 | -0.527562 | H | 5.162748  | 1.495128  | -0.555182 |
| C  | 2.163242 | -0.942040 | -1.634295 | H | 2.837886  | 2.524488  | -1.431235 |
| C  | 3.437204 | -1.419803 | -1.250078 | C | -0.989408 | -1.201350 | 0.298112  |
| C  | 3.356286 | -1.915089 | 0.081127  | H | -0.714259 | -1.867733 | 1.106529  |
| C  | 2.026620 | -1.763491 | 0.547718  | C | -2.352562 | -0.755568 | 0.192123  |
| H  | 1.887034 | -0.517734 | -2.585976 | C | -2.768689 | 0.168973  | -0.912273 |
| H  | 4.326944 | -1.385127 | -1.856430 | C | -4.176114 | 0.579969  | -0.979246 |
| H  | 4.175790 | -2.315556 | 0.654429  | C | -5.075101 | 0.153484  | -0.085791 |
| H  | 1.660474 | -2.040601 | 1.522016  | C | -4.689760 | -0.754441 | 1.016352  |
| Fe | 2.780100 | 0.091215  | 0.035025  | C | -3.272774 | -1.178153 | 1.087860  |
| C  | 2.059744 | 1.966584  | 0.587139  | H | -4.430633 | 1.244783  | -1.795039 |
| C  | 2.694626 | 1.339610  | 1.694127  | H | -3.022500 | -1.848314 | 1.902540  |
| C  | 4.048682 | 1.089535  | 1.335026  | H | -6.116733 | 0.446934  | -0.121546 |
| C  | 4.246125 | 1.558731  | 0.008114  | O | -1.952871 | 0.567685  | -1.734426 |
| C  | 3.015360 | 2.098008  | -0.457547 | O | -5.489130 | -1.147135 | 1.840977  |
| H  | 1.027186 | 2.274988  | 0.539988  | N | -0.063950 | -0.840186 | -0.540154 |
| H  | 2.234956 | 1.096092  | 2.638023  | H | -0.404164 | -0.221447 | -1.293388 |
| H  | 4.790288 | 0.611371  | 1.953795  |   |           |           |           |

**7:** E = -155.946736278184 au

|   |           |           |           |   |           |           |           |
|---|-----------|-----------|-----------|---|-----------|-----------|-----------|
| C | 0.526433  | 1.599899  | -0.365156 | H | 0.256094  | -1.775035 | -1.094370 |
| C | 0.527180  | 0.518990  | 0.405646  | H | 1.318552  | 0.396588  | 1.142997  |
| C | -0.527180 | -0.518990 | 0.405646  | H | -1.318552 | -0.396588 | 1.142997  |
| C | -0.526433 | -1.599899 | -0.365156 | H | 1.314585  | 2.339670  | -0.299691 |
| H | -0.256094 | 1.775036  | -1.094370 | H | -1.314585 | -2.339670 | -0.299691 |

**8:** E = -171.991891251622 au

|   |           |           |           |   |           |           |           |
|---|-----------|-----------|-----------|---|-----------|-----------|-----------|
| C | -1.581569 | -0.294566 | 0.180630  | H | -1.434878 | -0.790916 | 1.146245  |
| N | -0.669542 | 0.336791  | -0.418234 | H | 0.758213  | 1.411222  | 0.661440  |
| C | 0.608101  | 0.467515  | 0.143497  | H | 1.493944  | -1.292315 | -0.608690 |
| C | 1.616997  | -0.377706 | -0.042793 | H | 2.595187  | -0.159093 | 0.360998  |
| H | -2.565665 | -0.367320 | -0.278660 |   |           |           |           |

**9:** E = -249.371496625609 au

|   |           |           |           |   |           |           |           |
|---|-----------|-----------|-----------|---|-----------|-----------|-----------|
| C | 2.799037  | 0.335338  | -0.016169 | H | 3.800561  | 0.050136  | -0.311782 |
| C | 1.796627  | -0.531042 | -0.049406 | H | 1.973755  | -1.561784 | -0.347168 |
| C | 0.411970  | -0.213724 | 0.375570  | H | 0.155189  | -0.440686 | 1.420387  |
| N | -0.451450 | 0.239991  | -0.426931 | H | -1.914728 | 1.572644  | 0.242915  |
| C | -1.754069 | 0.524481  | 0.003813  | H | -2.634329 | -1.367495 | -0.301982 |
| C | -2.768945 | -0.334257 | -0.008008 | H | -3.763049 | -0.011090 | 0.266238  |
| H | 2.651397  | 1.363510  | 0.292919  |   |           |           |           |

**10:** E = -188.020759949538 au

|   |           |           |           |   |           |           |           |
|---|-----------|-----------|-----------|---|-----------|-----------|-----------|
| C | 0.472279  | 1.438282  | -0.371162 | H | -0.346078 | 1.607302  | -1.072996 |
| N | 0.512710  | 0.441401  | 0.410694  | H | 0.346078  | -1.607304 | -1.072996 |
| N | -0.512708 | -0.441401 | 0.410694  | H | 1.281548  | 2.157096  | -0.320107 |
| C | -0.472278 | -1.438282 | -0.371162 | H | -1.281549 | -2.157094 | -0.320107 |

**11:** E = -265.381632374242 au

|   |           |           |           |   |           |           |           |
|---|-----------|-----------|-----------|---|-----------|-----------|-----------|
| C | 2.709246  | 0.347104  | -0.029288 | H | 2.556021  | 1.374632  | 0.275030  |
| C | 1.710225  | -0.520071 | -0.063157 | H | 3.709321  | 0.045893  | -0.307044 |
| N | 0.393908  | -0.228927 | 0.401338  | H | 1.846933  | -1.567126 | -0.314876 |
| N | -0.369439 | 0.240195  | -0.447939 | H | -1.822659 | 1.578249  | 0.268395  |
| C | -1.685793 | 0.531257  | 0.016534  | H | -2.531483 | -1.363533 | -0.321878 |
| C | -2.684703 | -0.336043 | -0.017447 | H | -3.684802 | -0.034919 | 0.260339  |
